# Supplementary material for: A chemoenzymatic synthesis of ceramide trafficking inhibitor HPA-12
Source: publisher site journal article supplement (doi:10.3762/bjoc.15.42), 2019-02-18

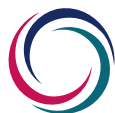

## Supporting Information

for

### **A chemoenzymatic synthesis of ceramide trafficking inhibitor HPA-12**

Seema V. Kanojia, Sucheta Chatterjee, Subrata Chattopadhyay and Dibakar Goswami

*Beilstein J. Org. Chem.* **2019**, *15*, 490–496. [doi:10.3762/bjoc.15.42](https://doi.org/10.3762/bjoc.15.42)

## NMR spectra

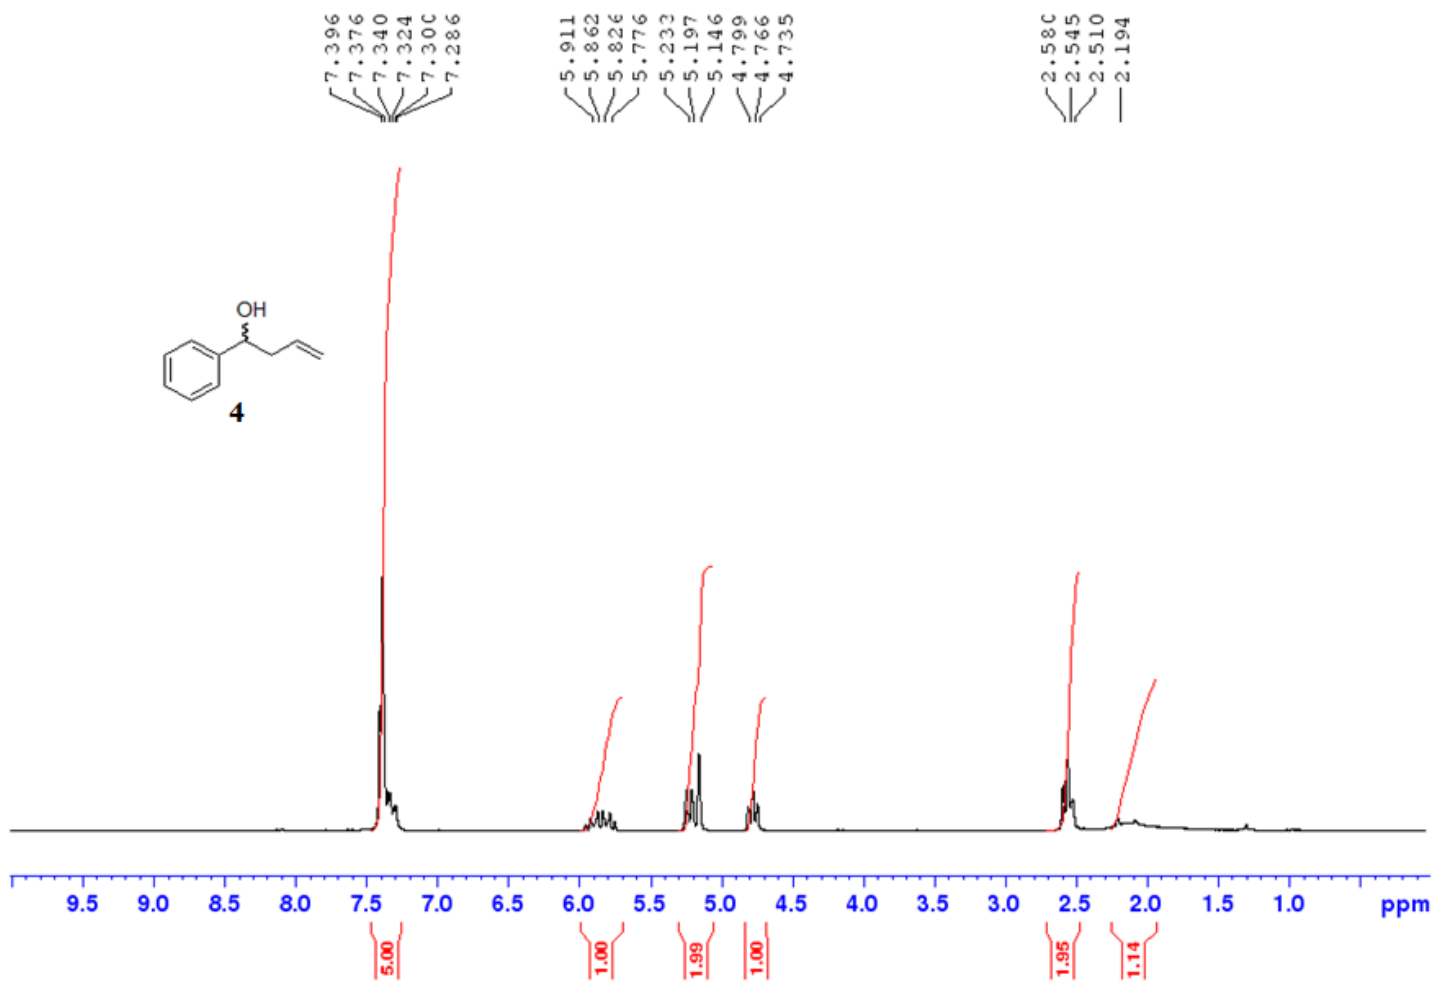

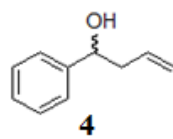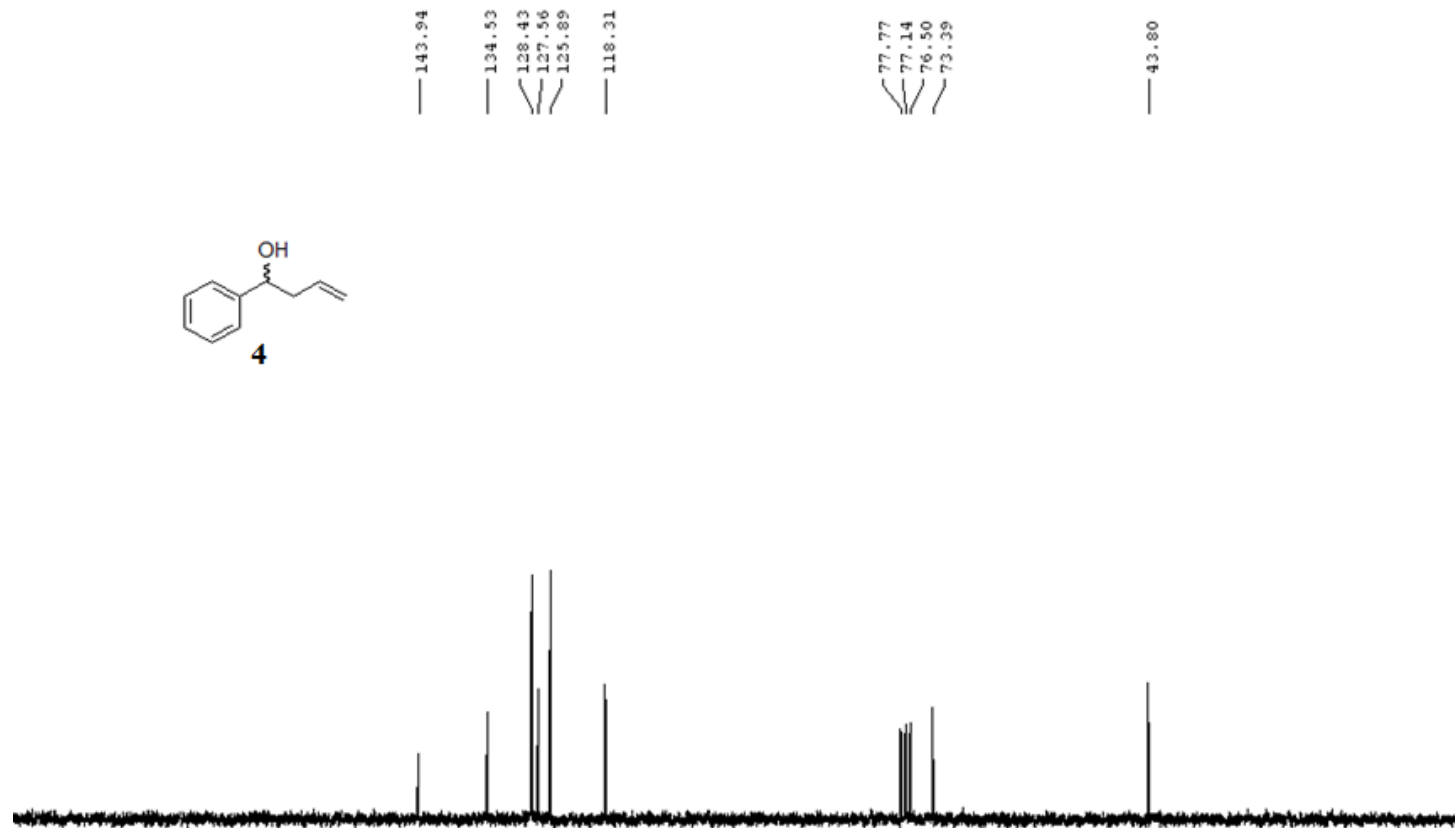

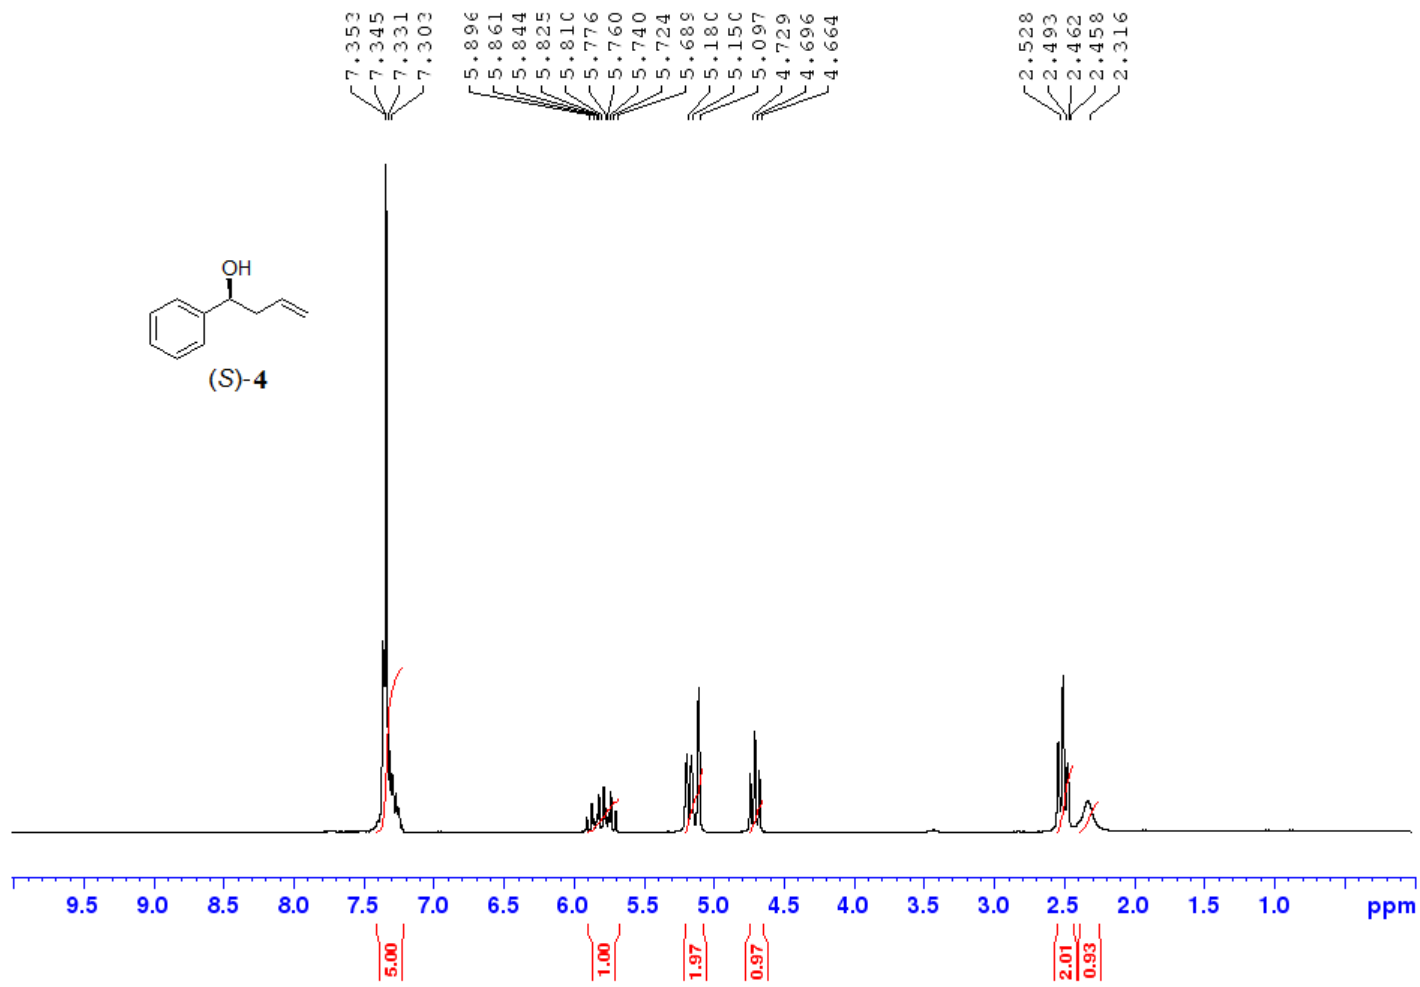

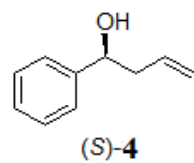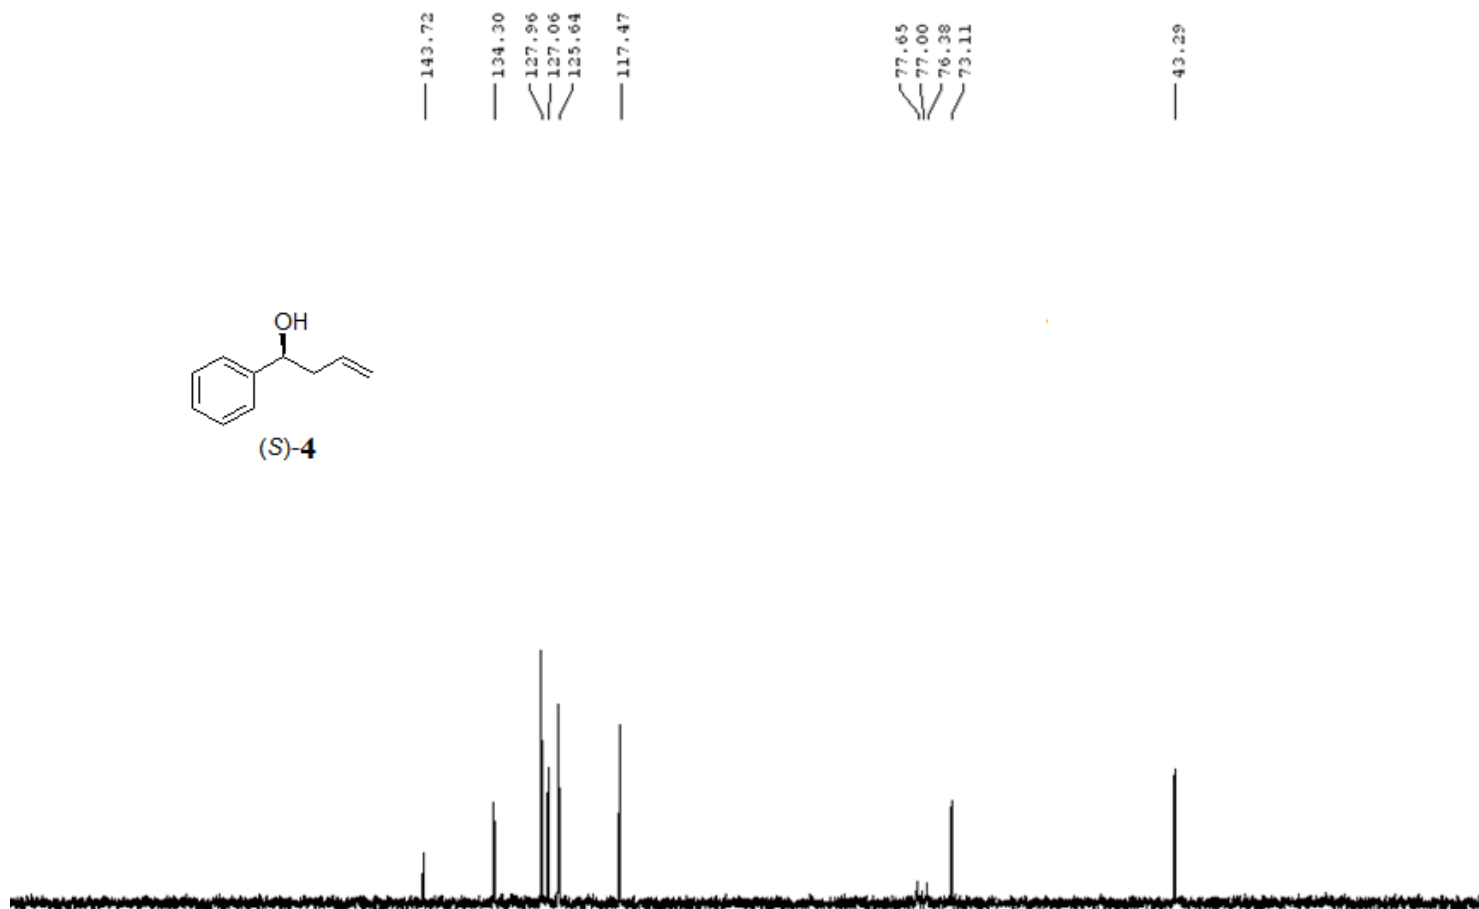

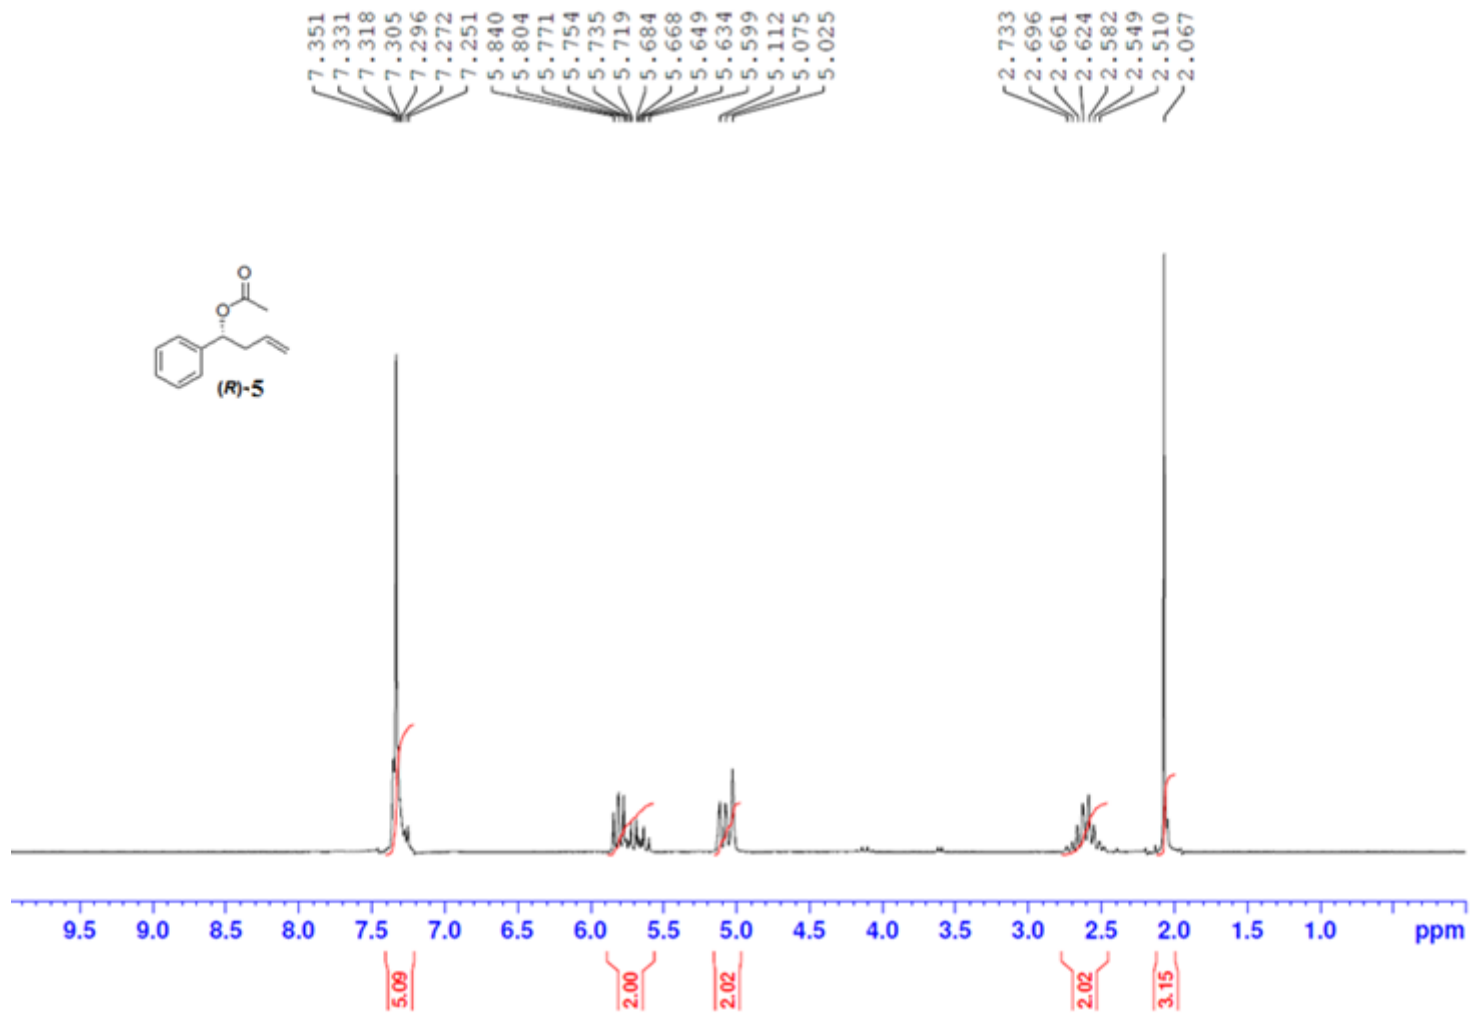

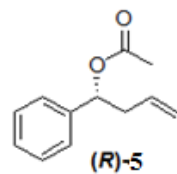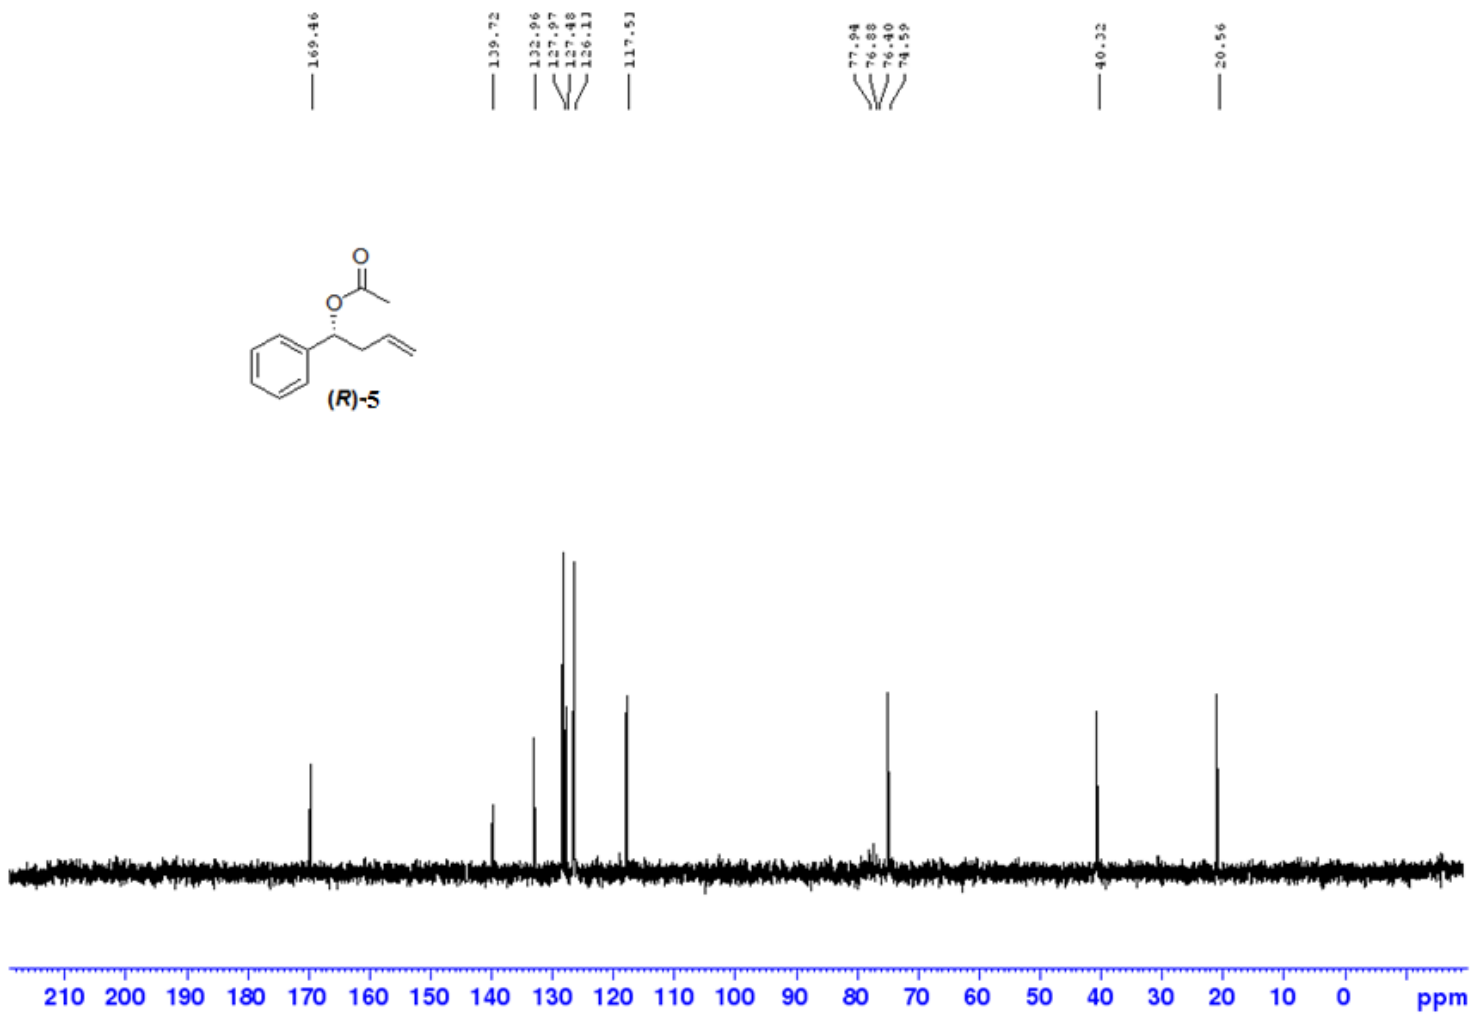

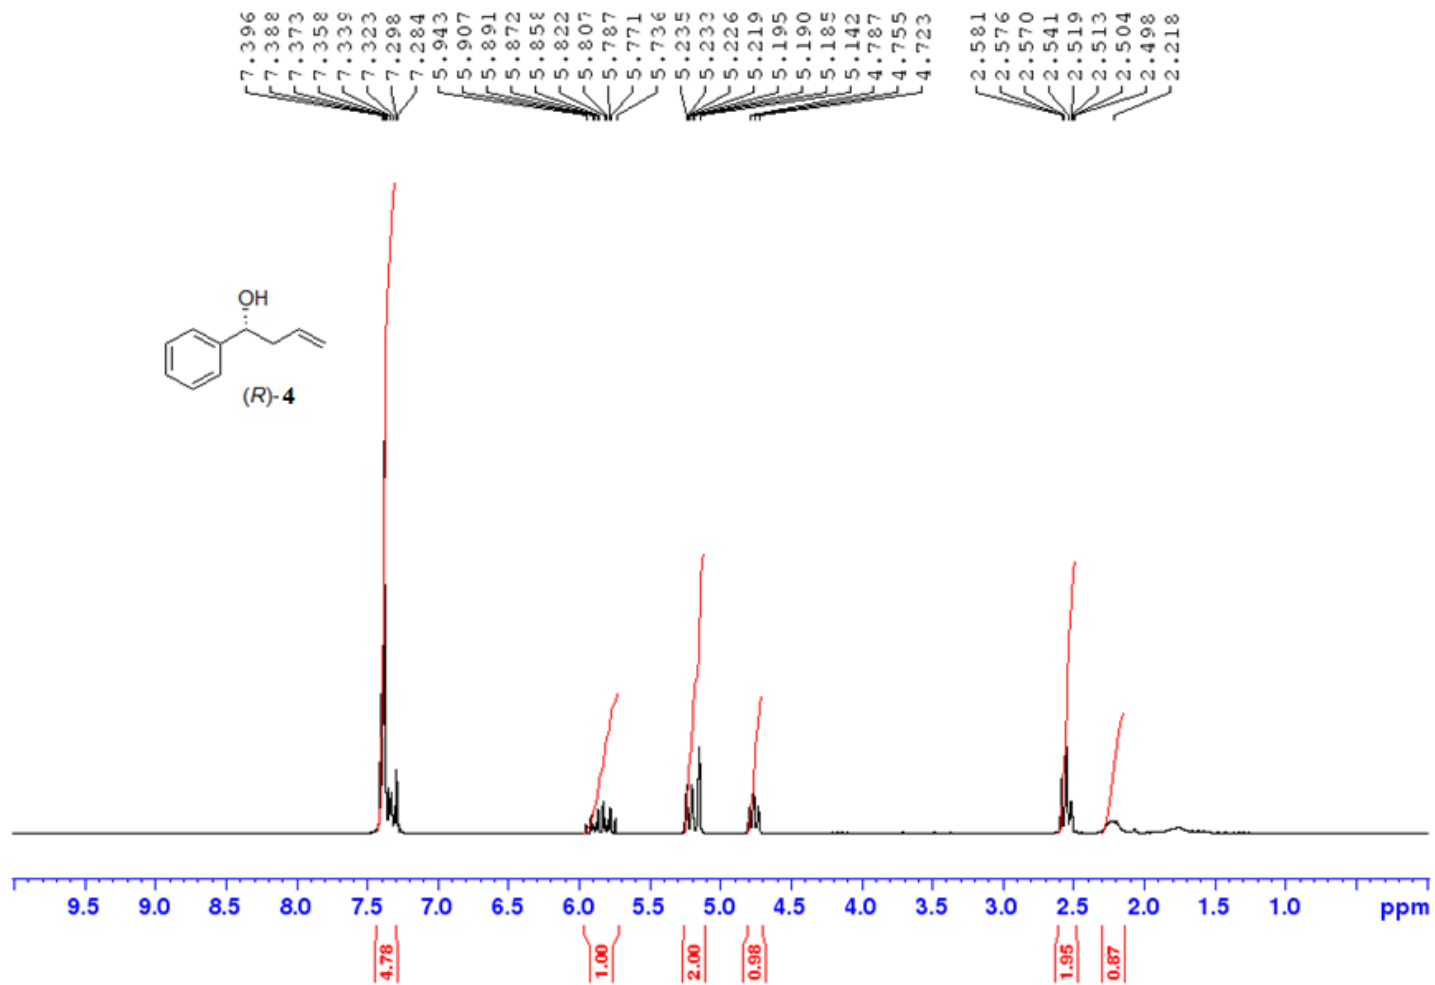



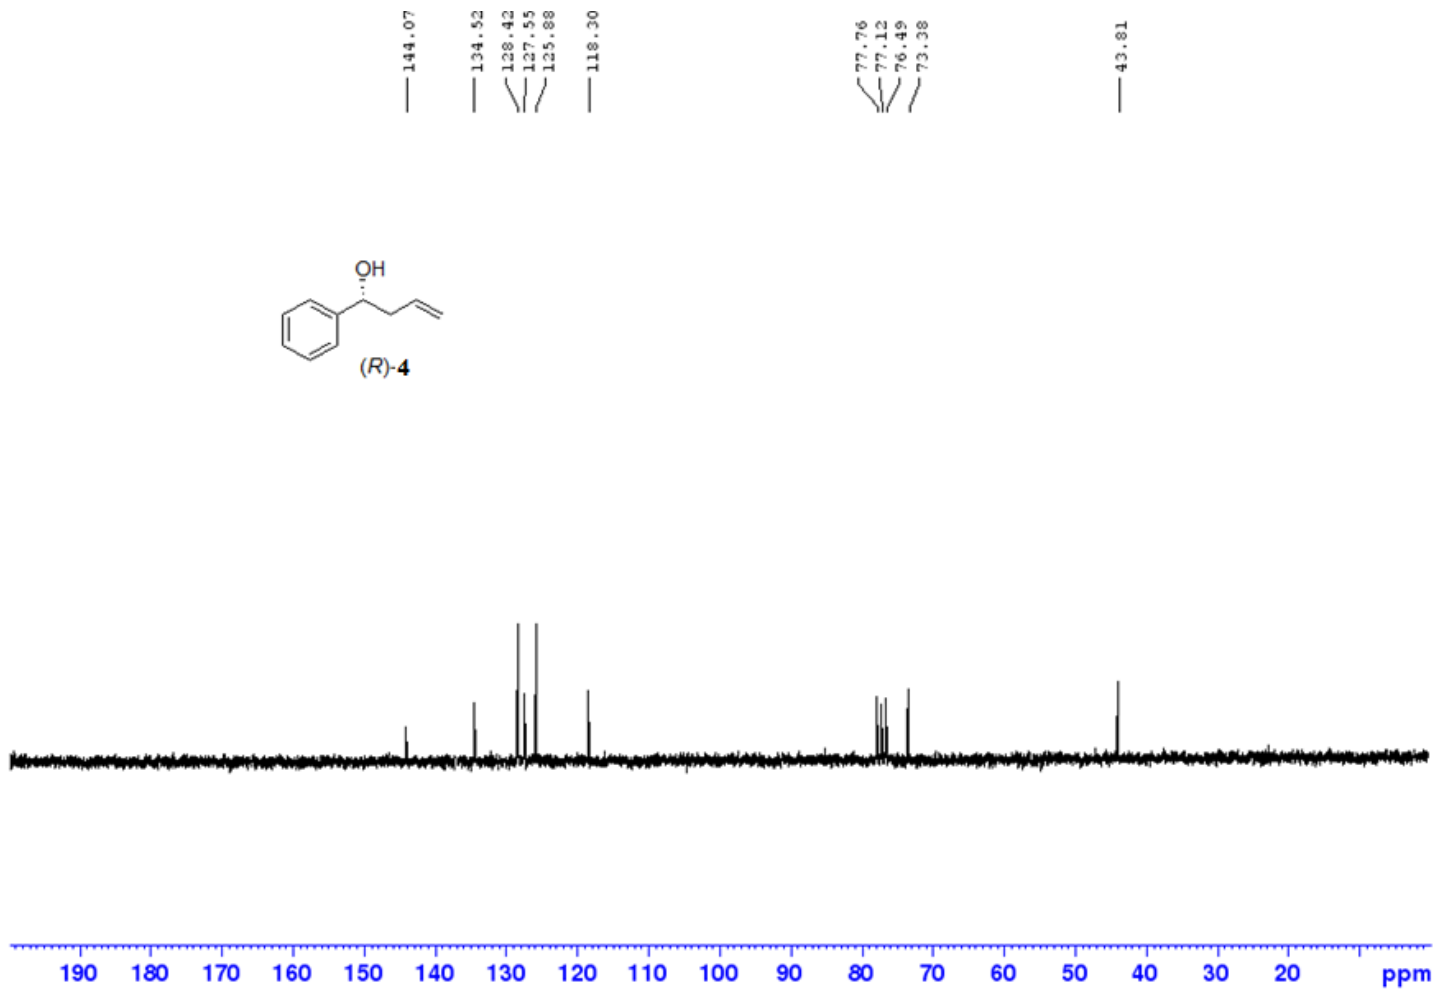

8.298  
8.280  
8.243  
8.226  
7.440  
7.426  
7.398  
7.384  
7.369  
7.340  
7.326  
7.312  
7.264  
6.090  
6.076  
6.063  
5.818  
5.804  
5.798  
5.784  
5.770  
5.756  
5.750  
5.736  
5.165  
5.131  
5.103  
5.083

2.872  
2.857  
2.842  
2.828  
2.813  
2.759  
2.747  
2.733  
2.718  
2.706

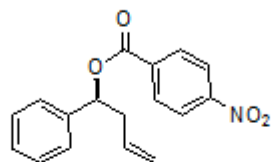

(S)-4a

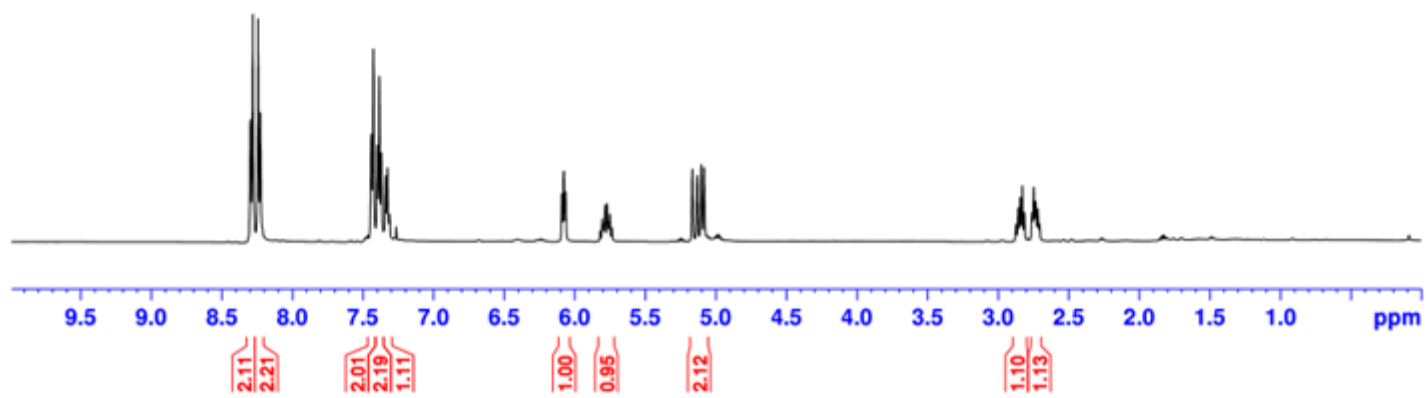

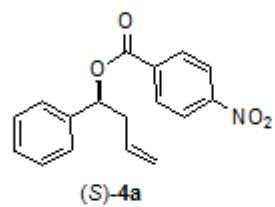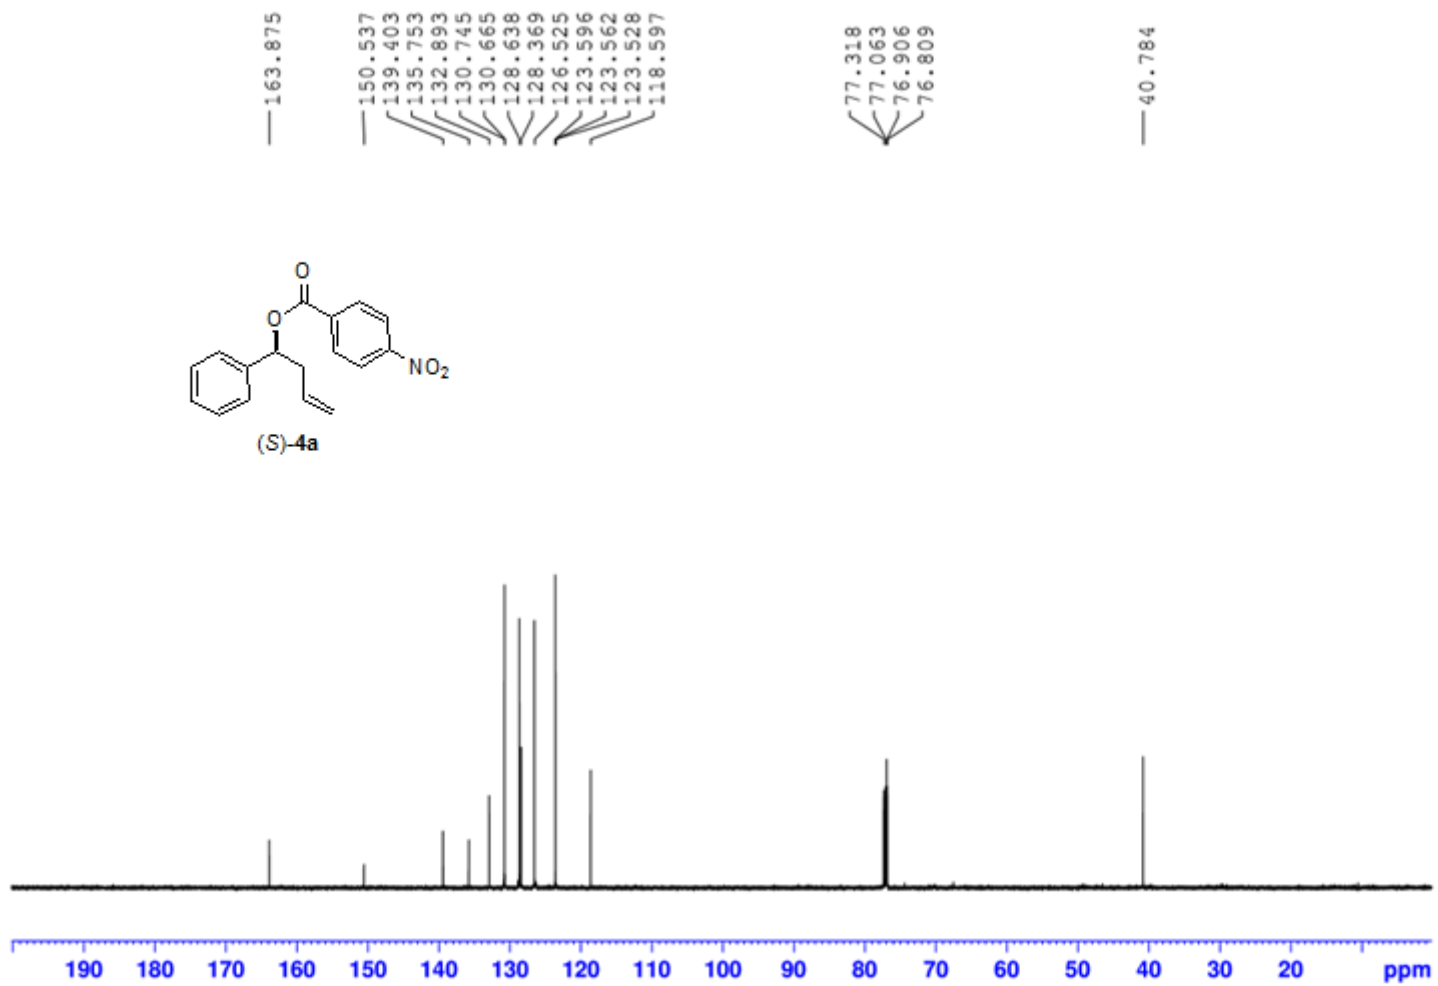

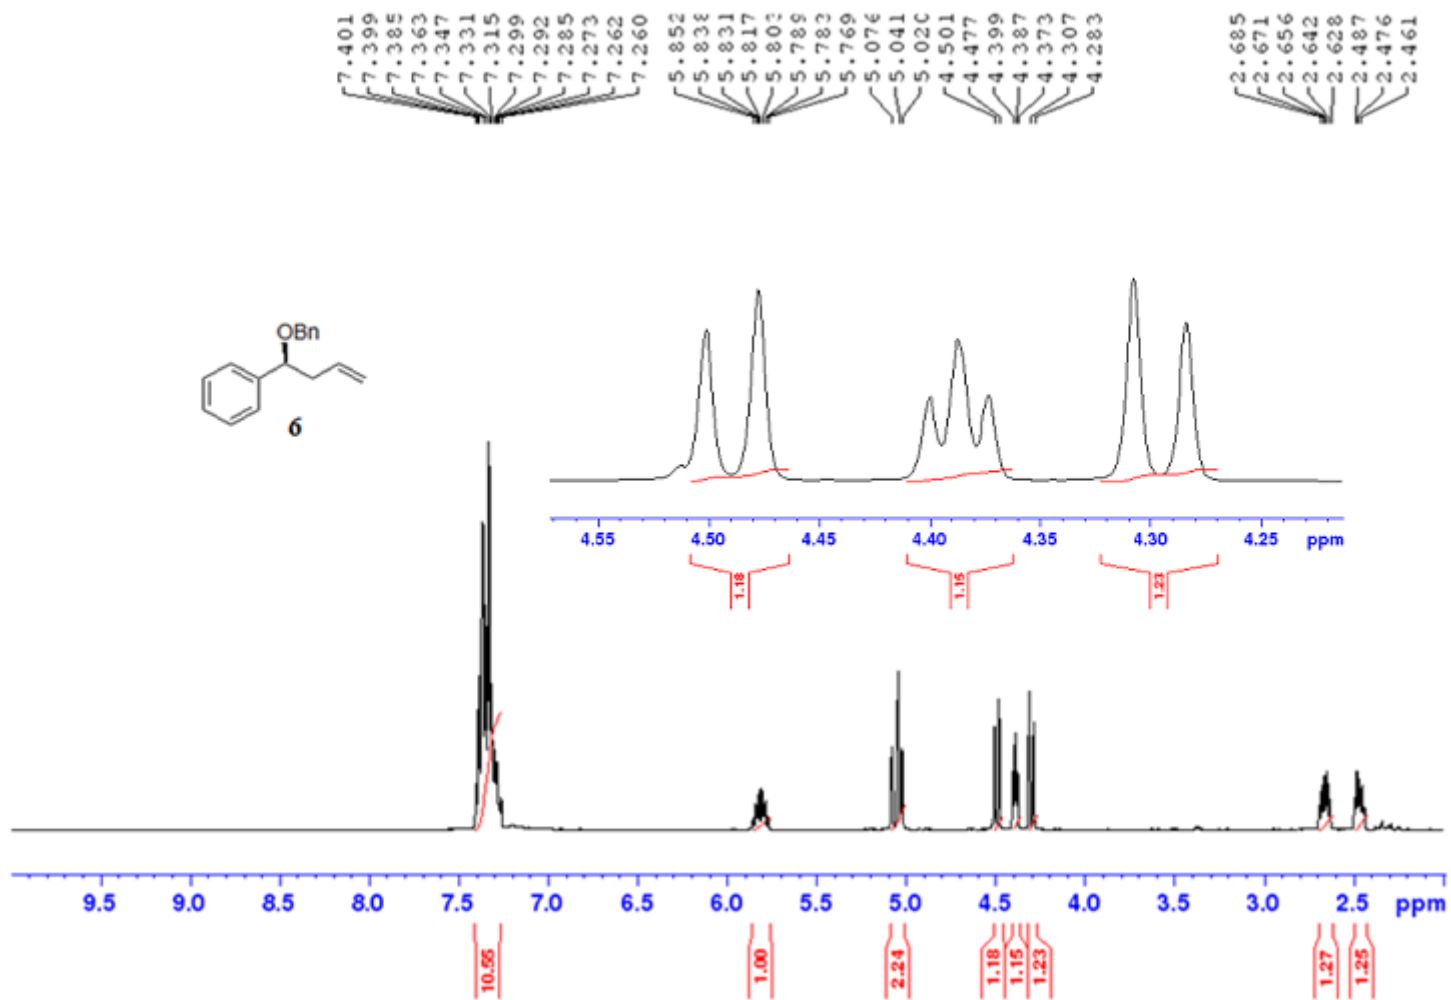

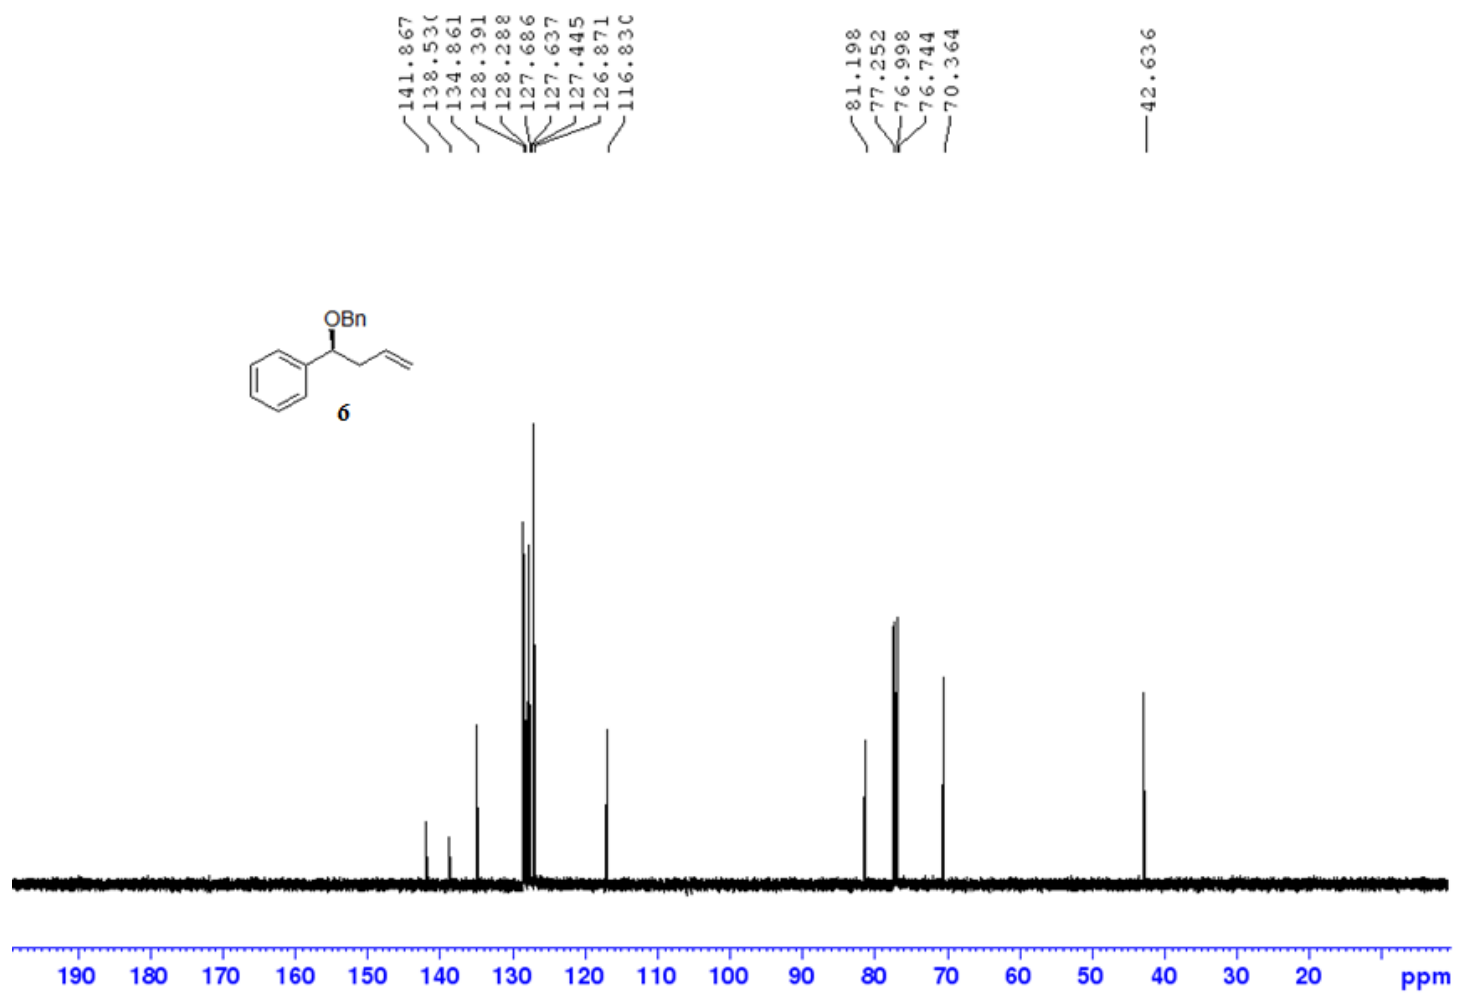

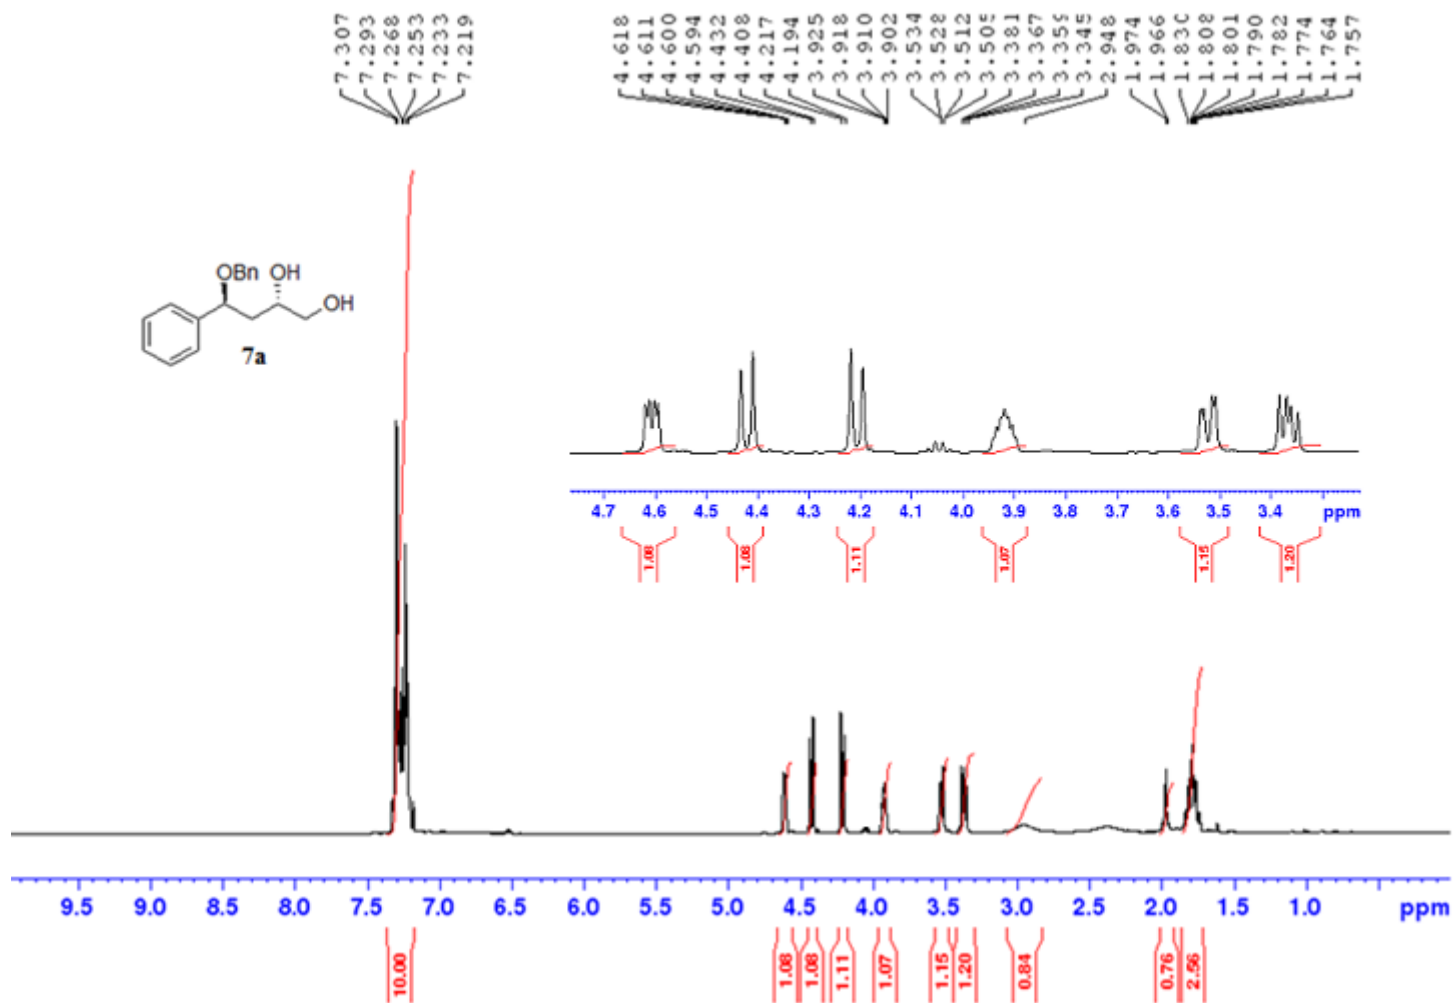

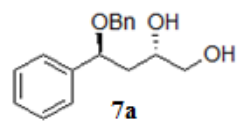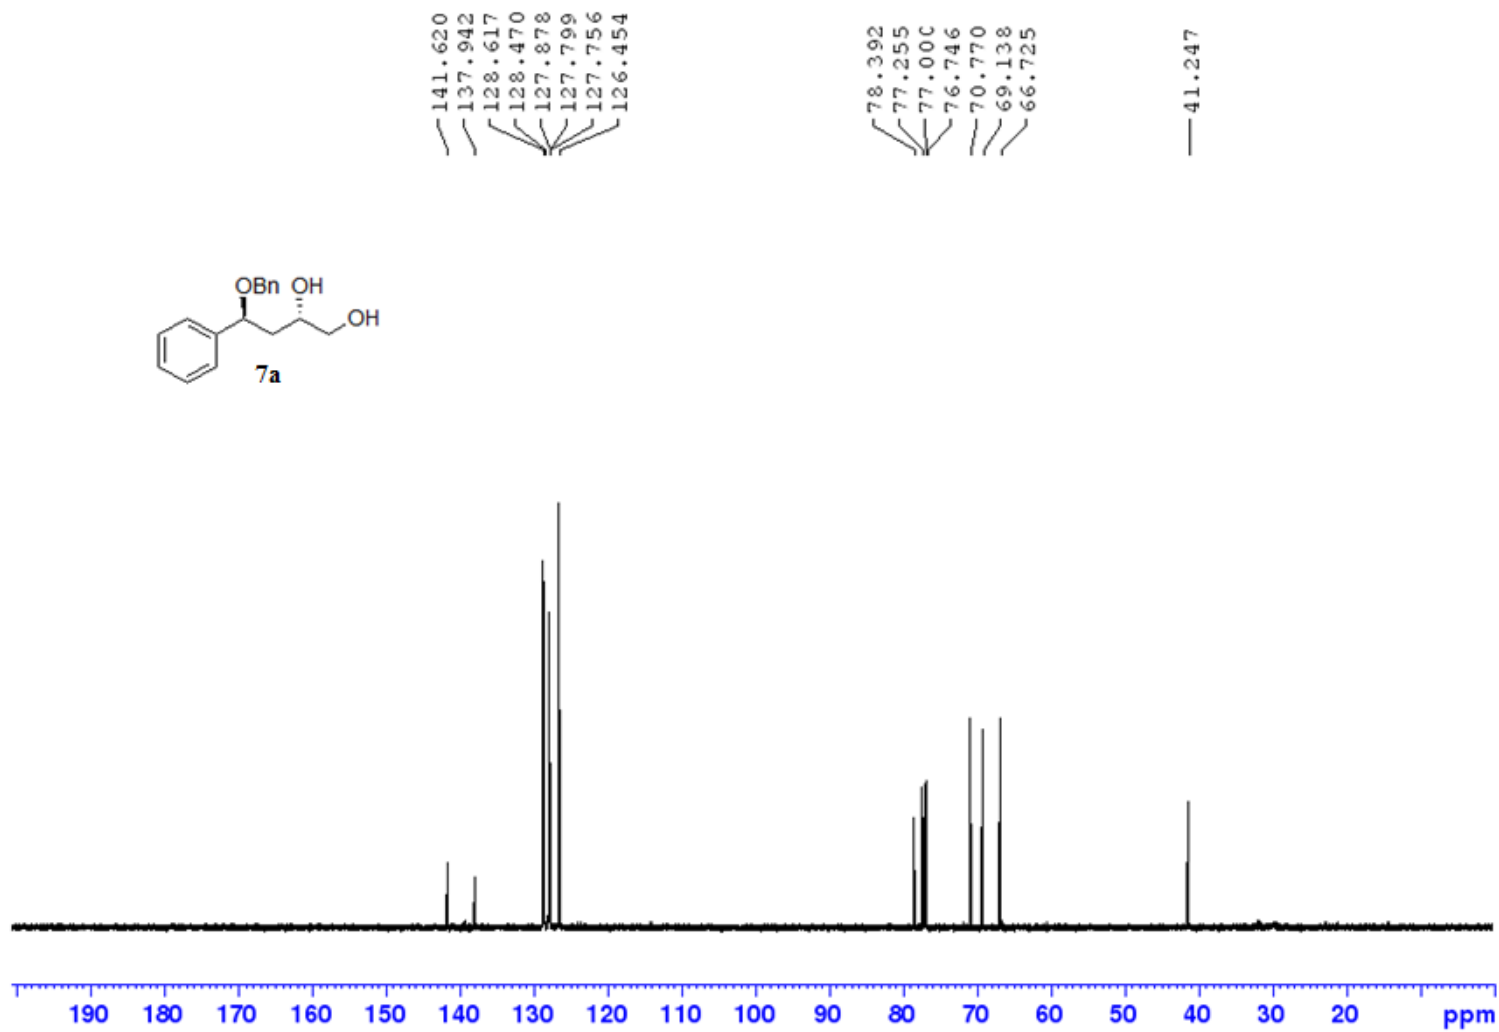

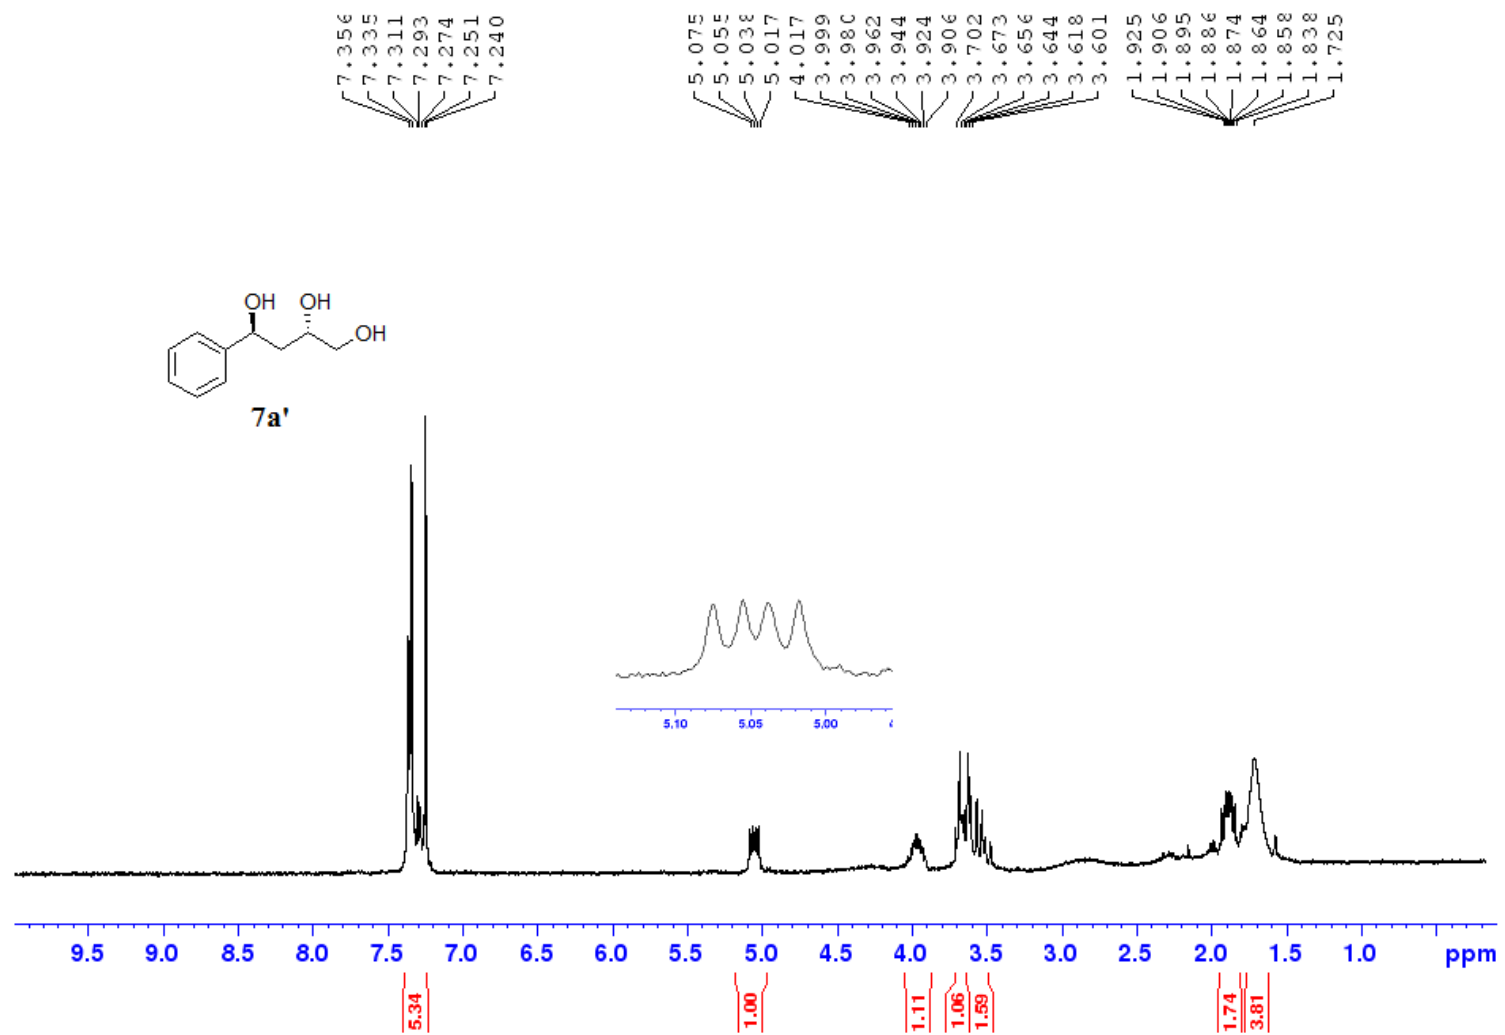



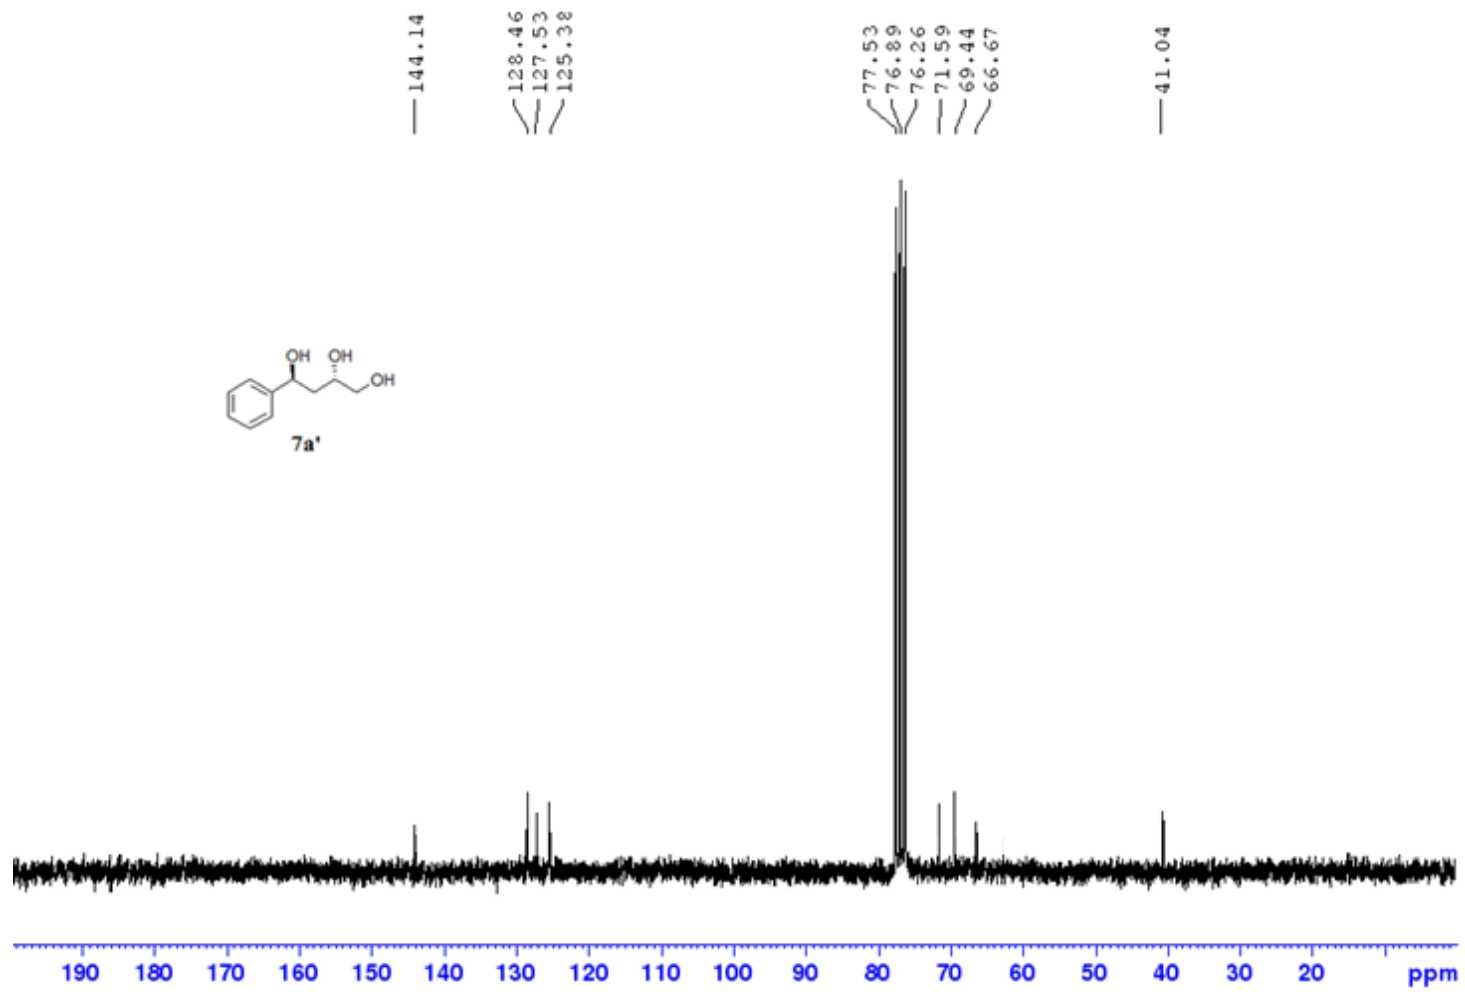

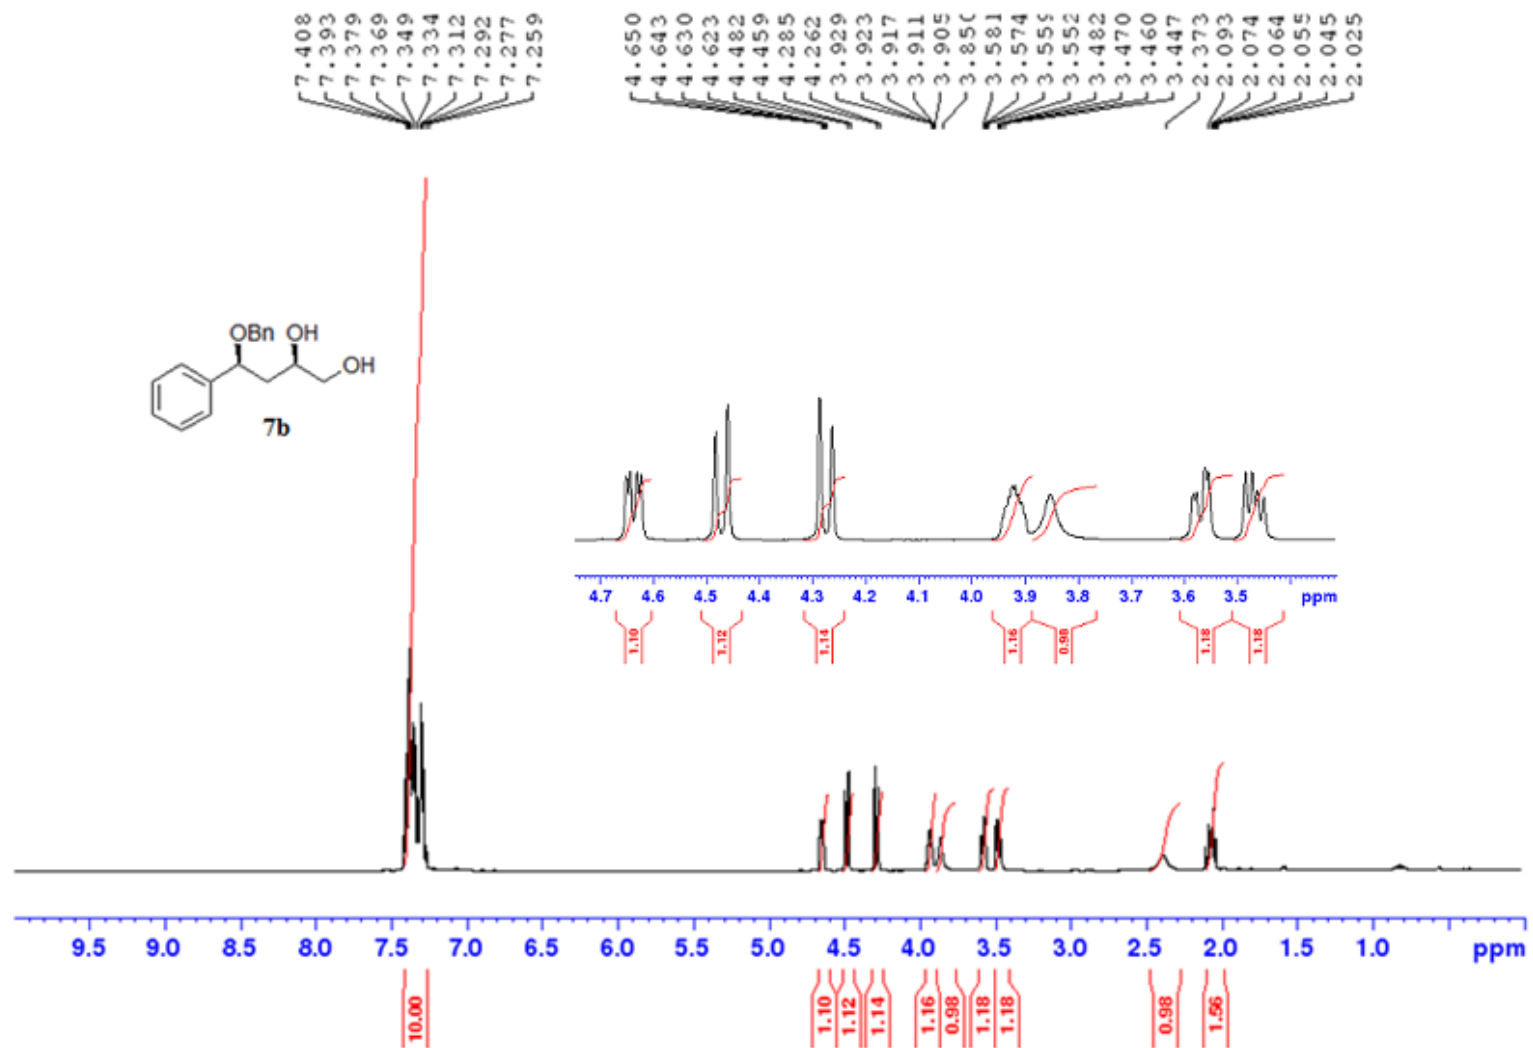

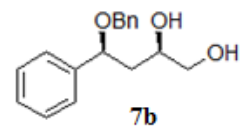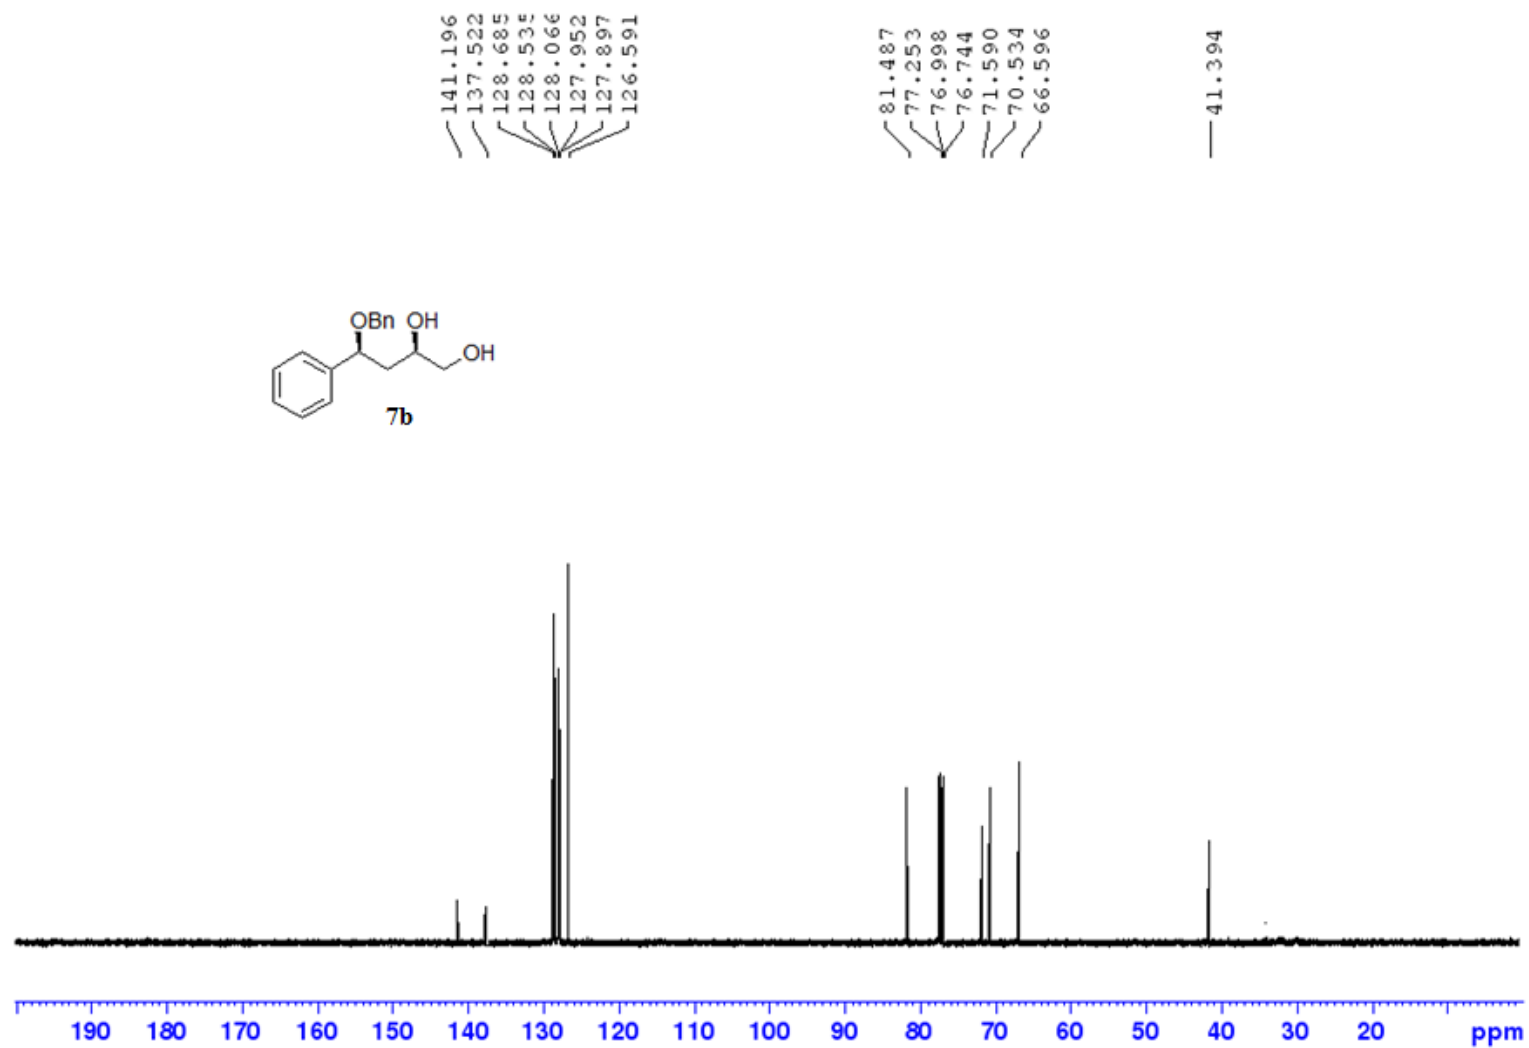

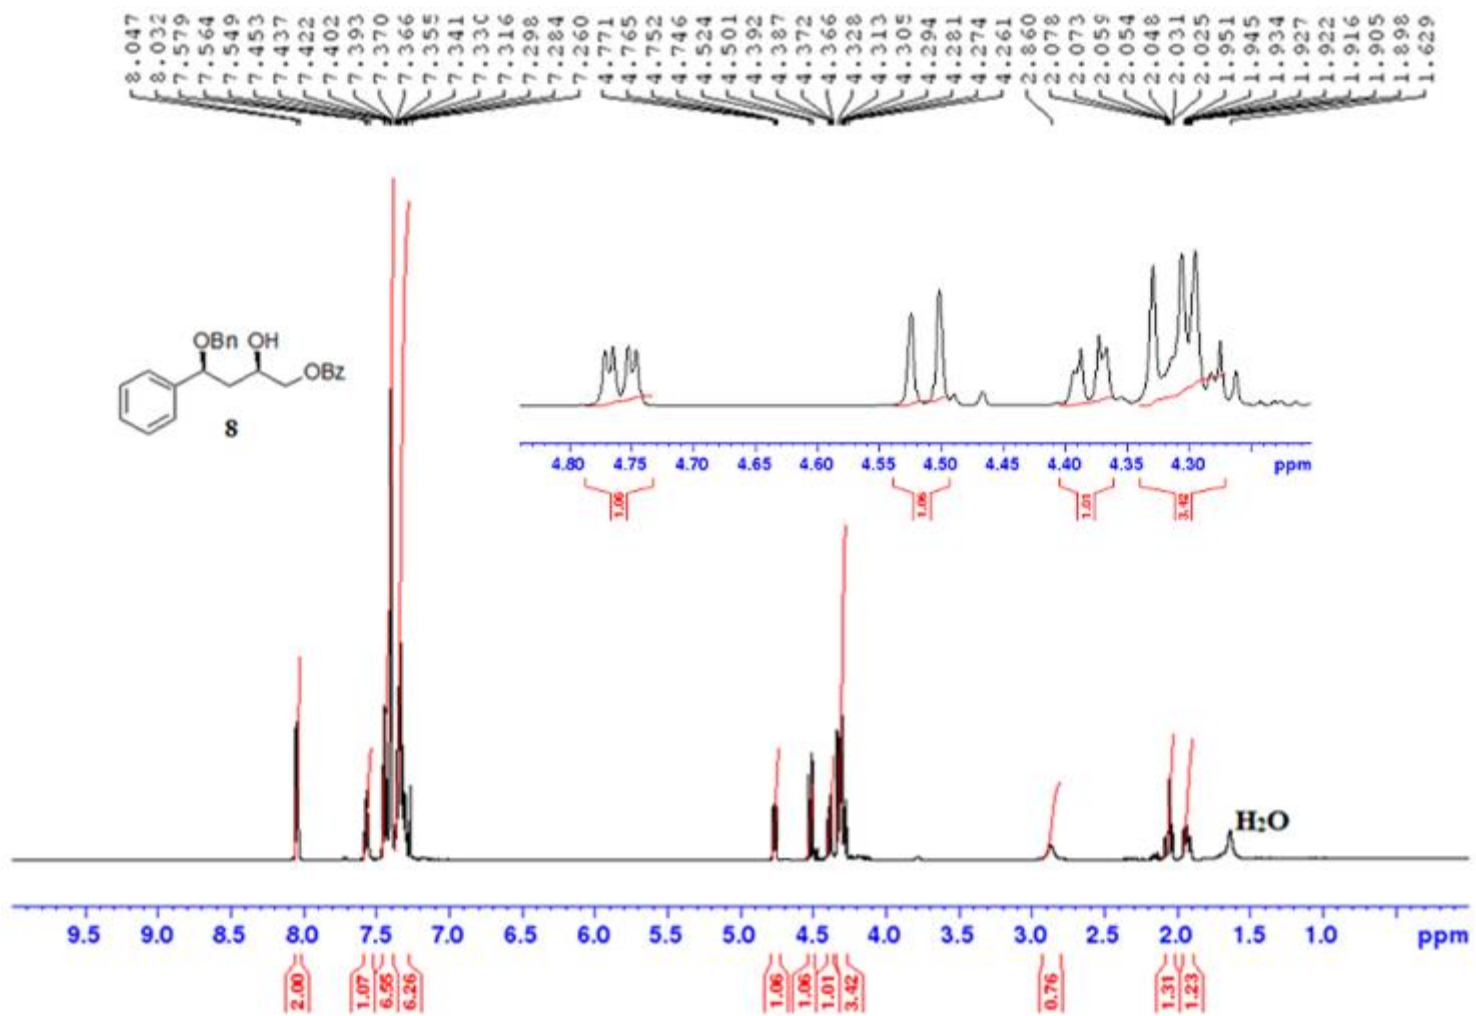

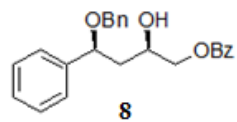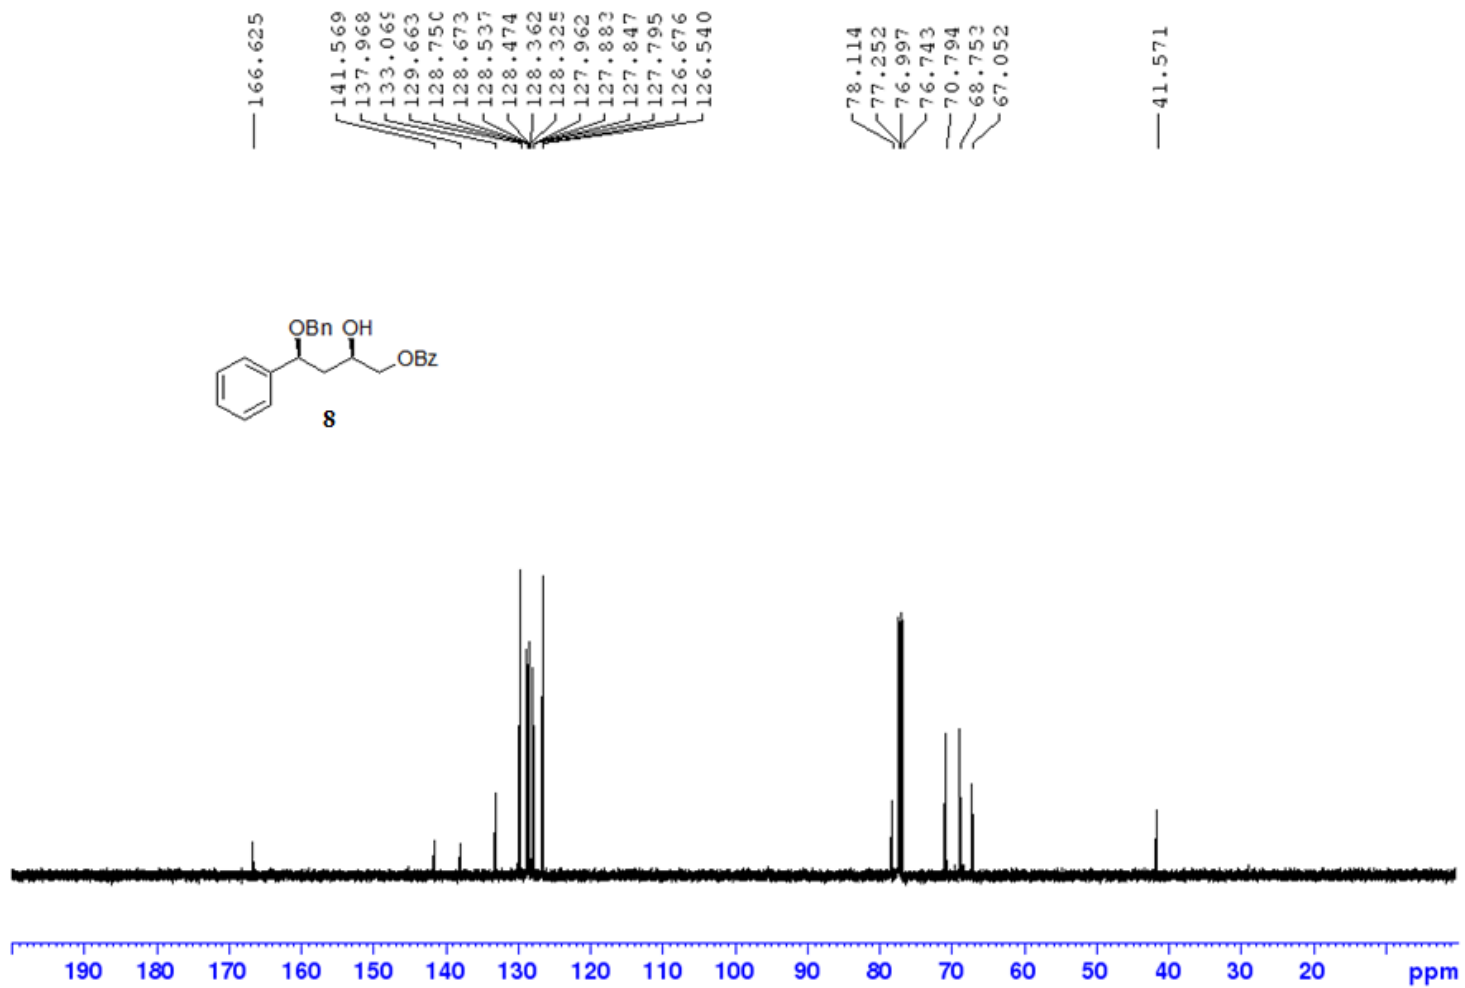

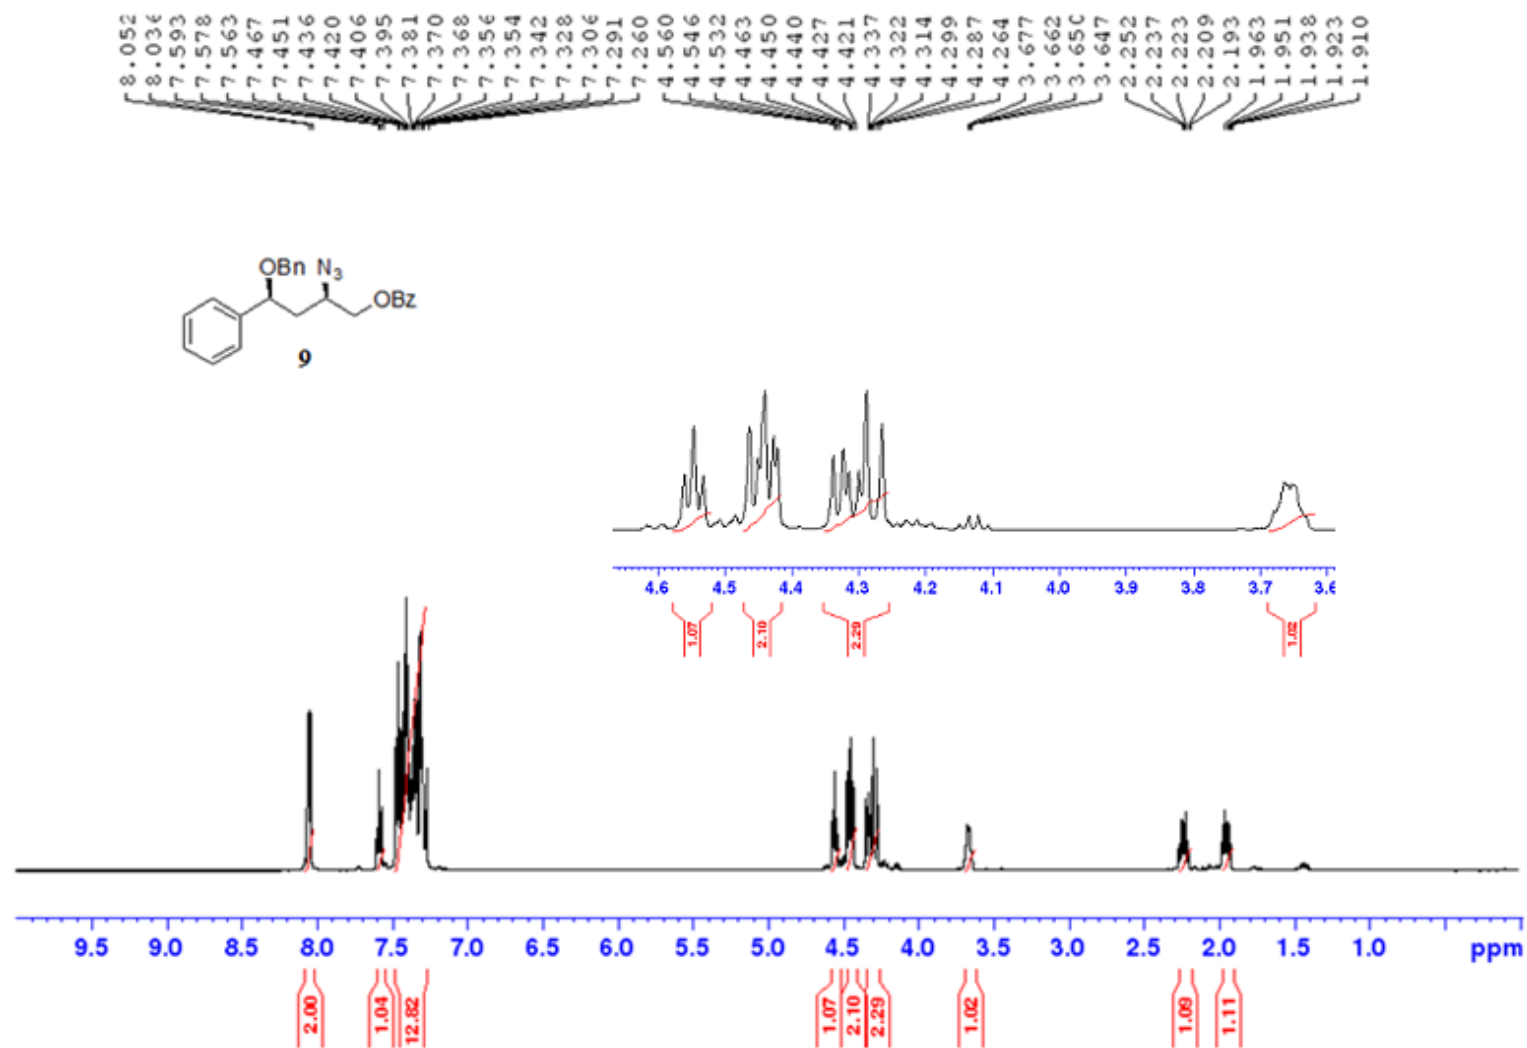

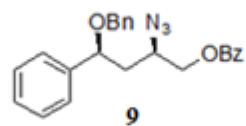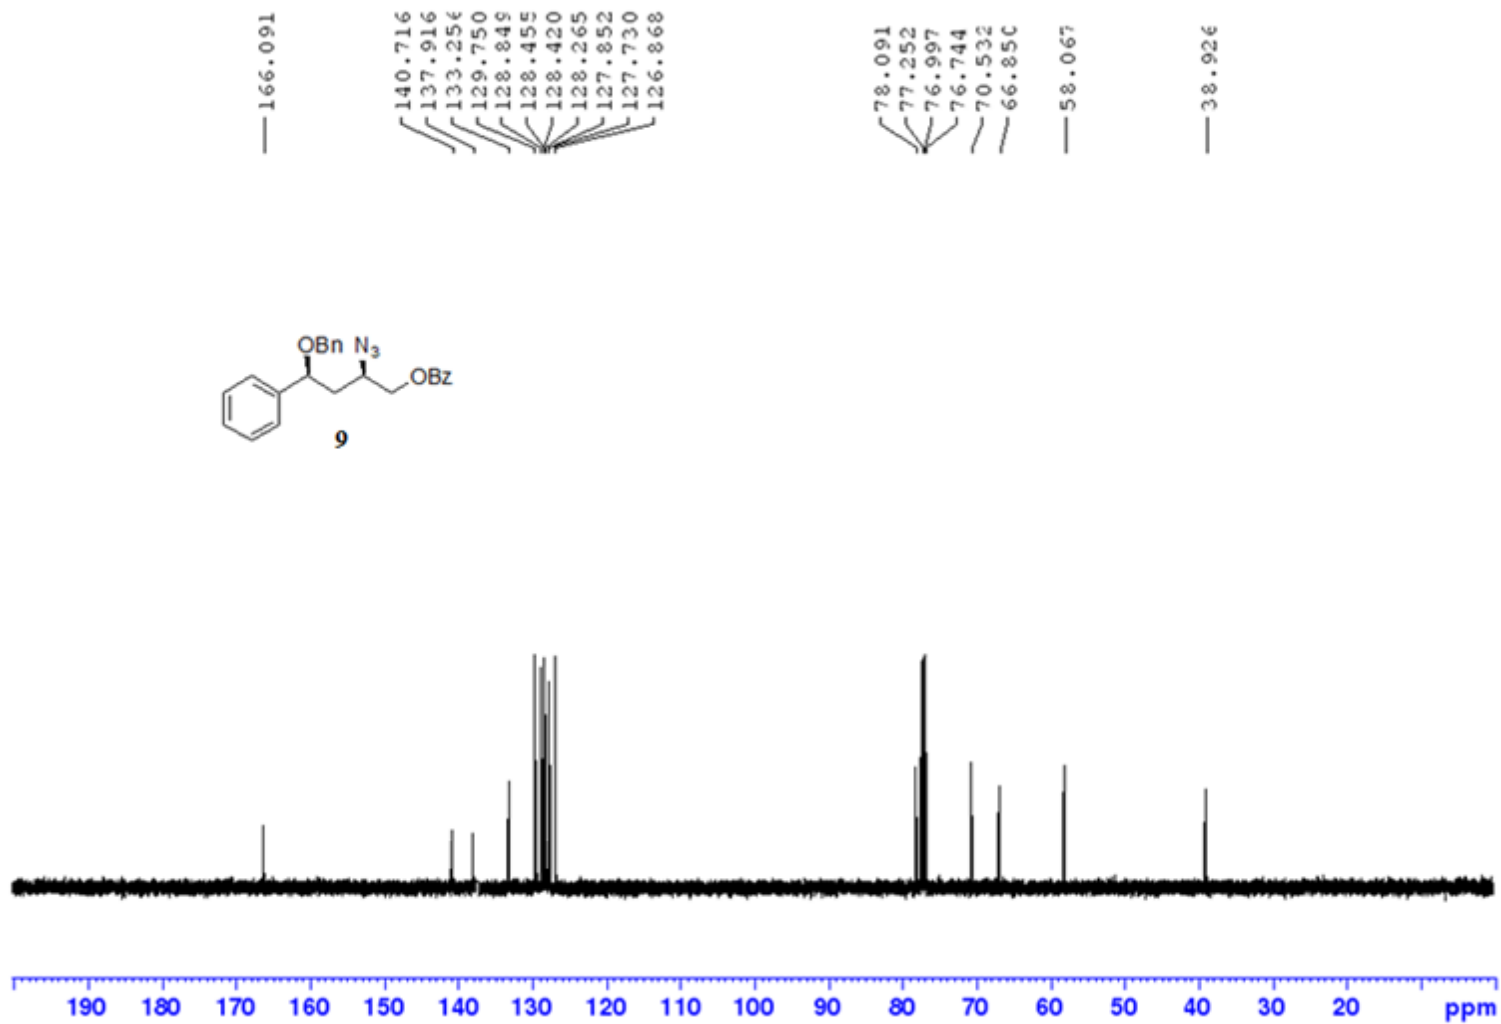

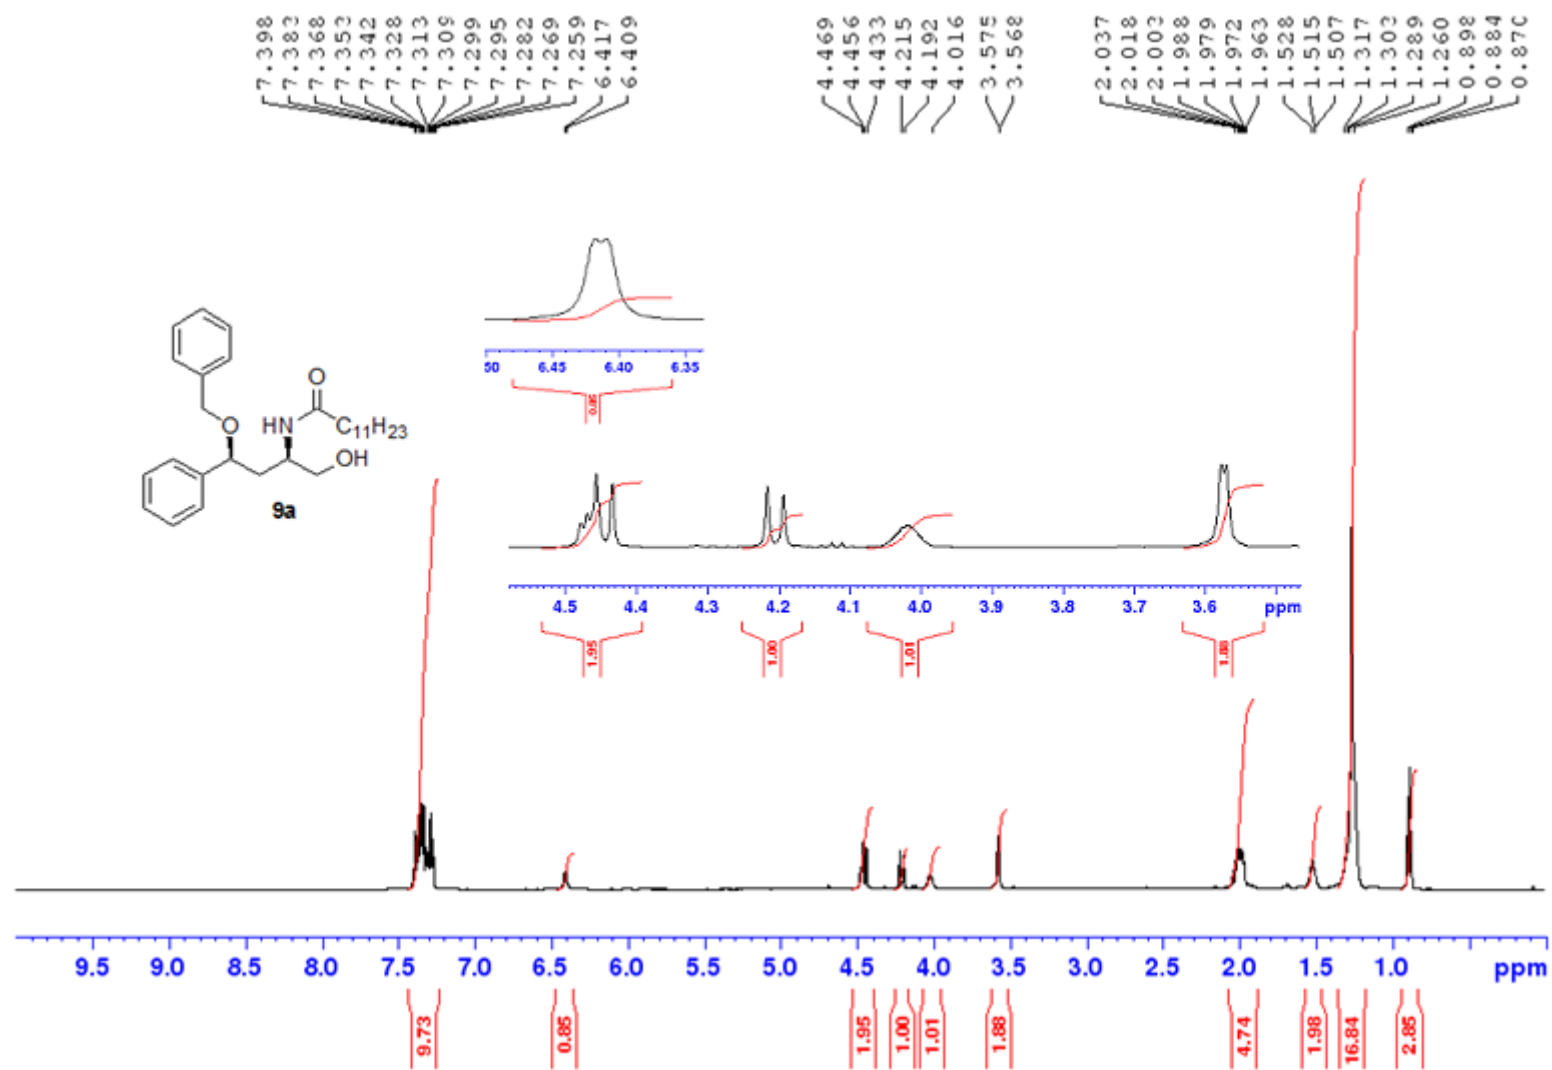



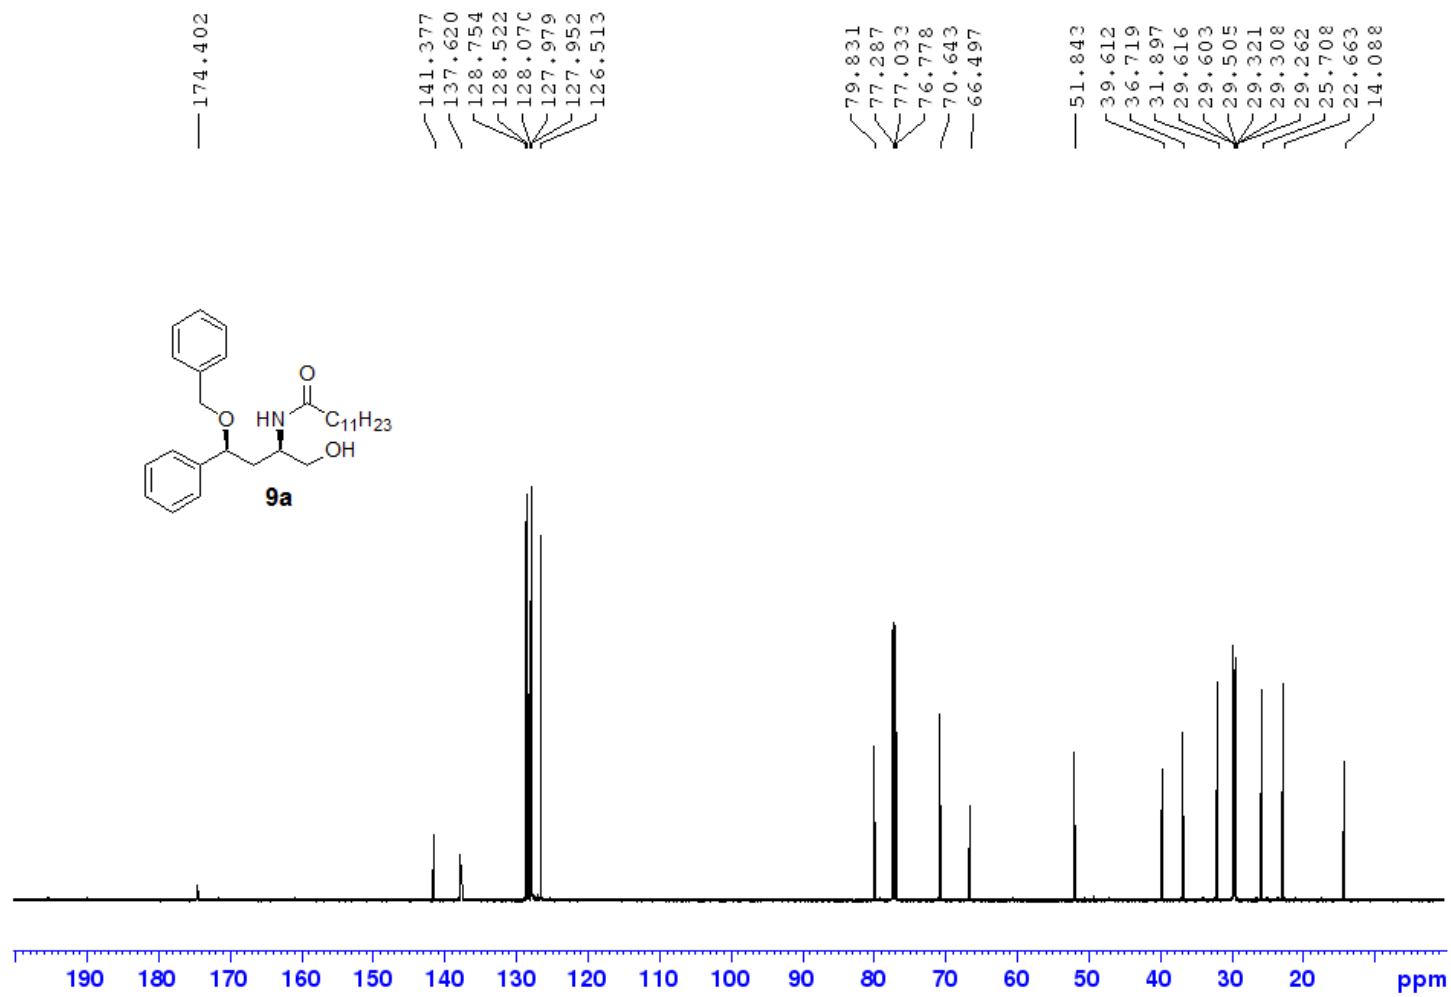

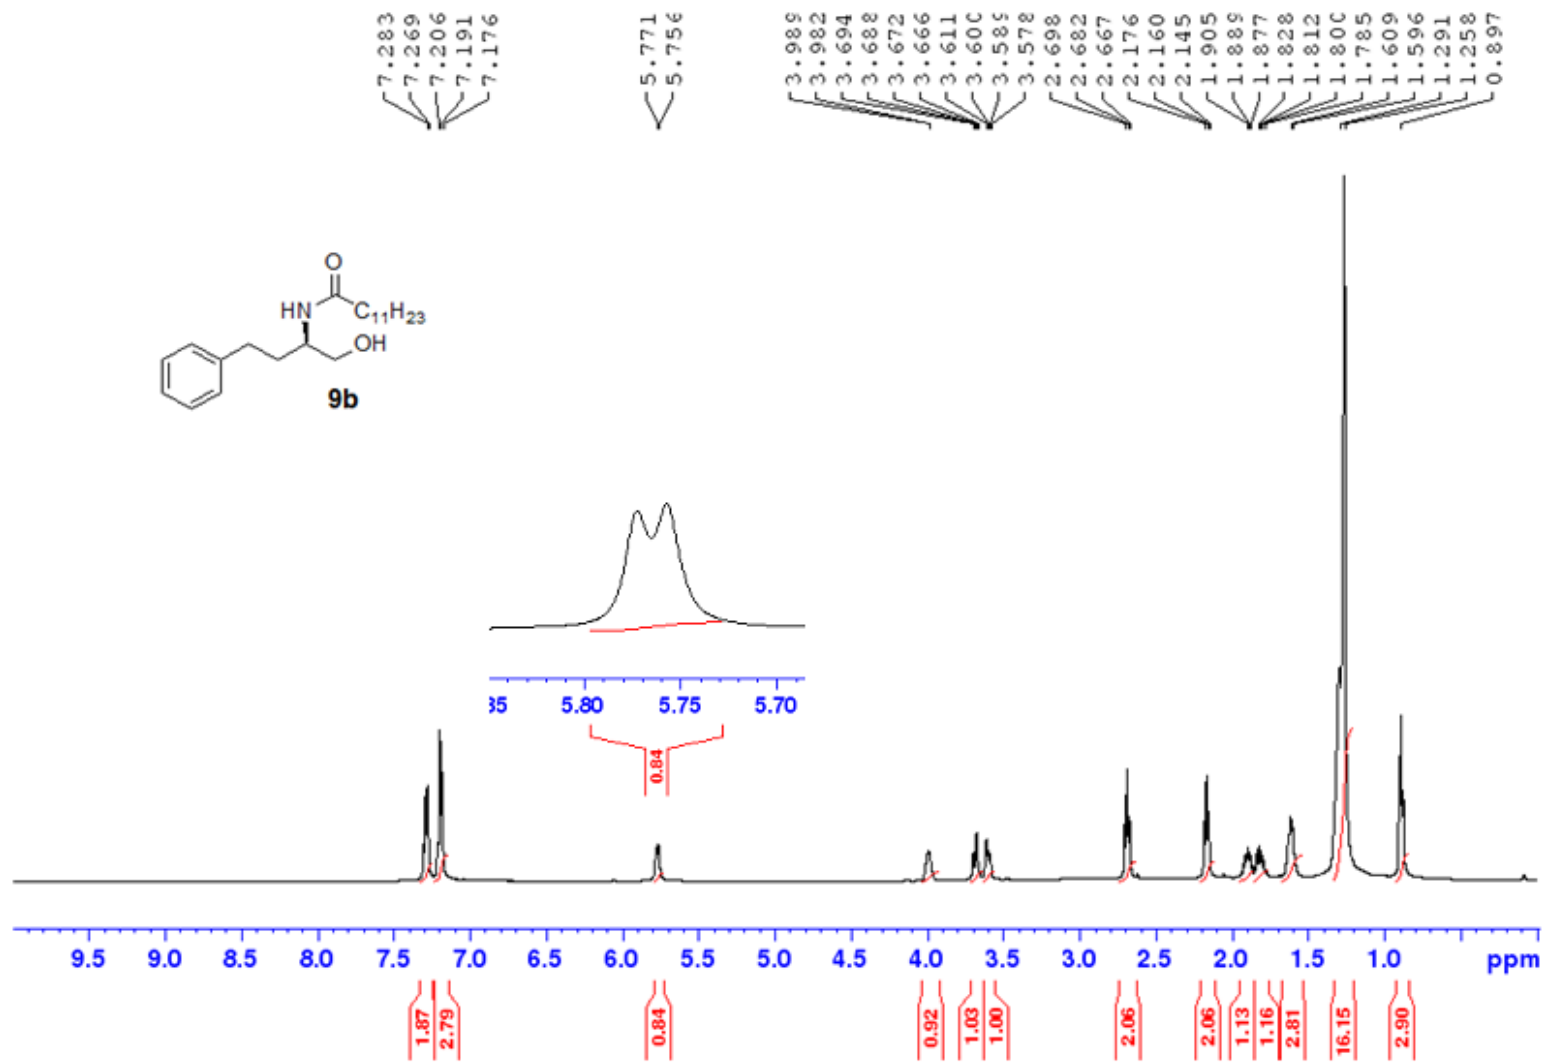

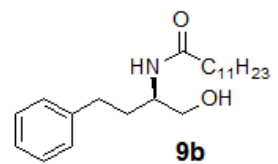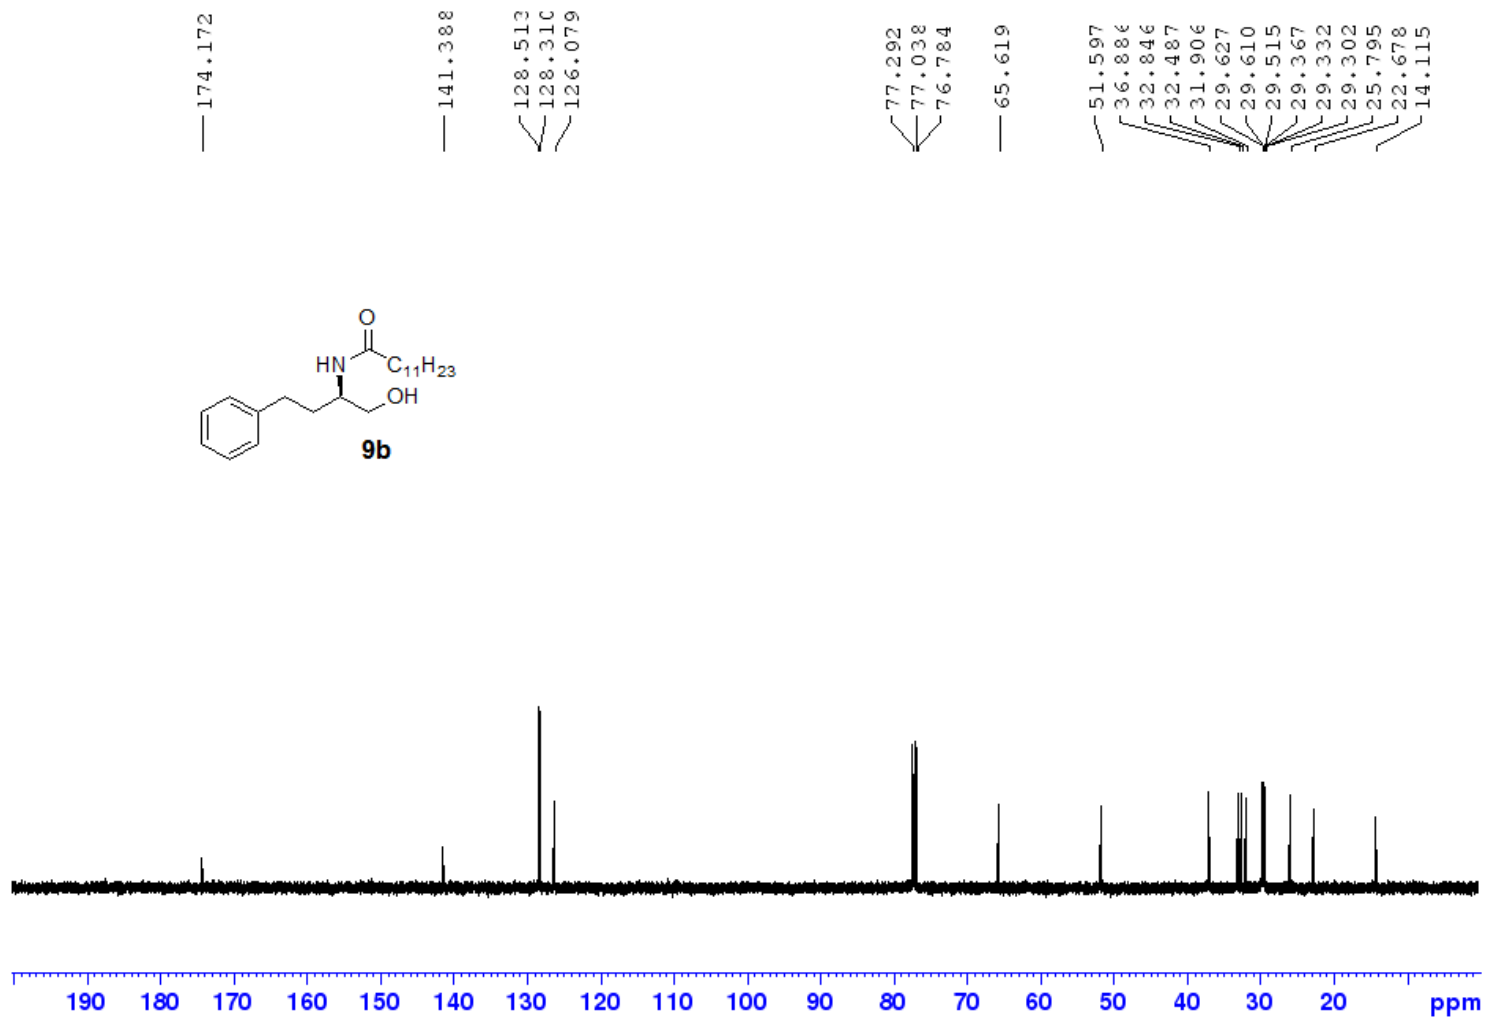

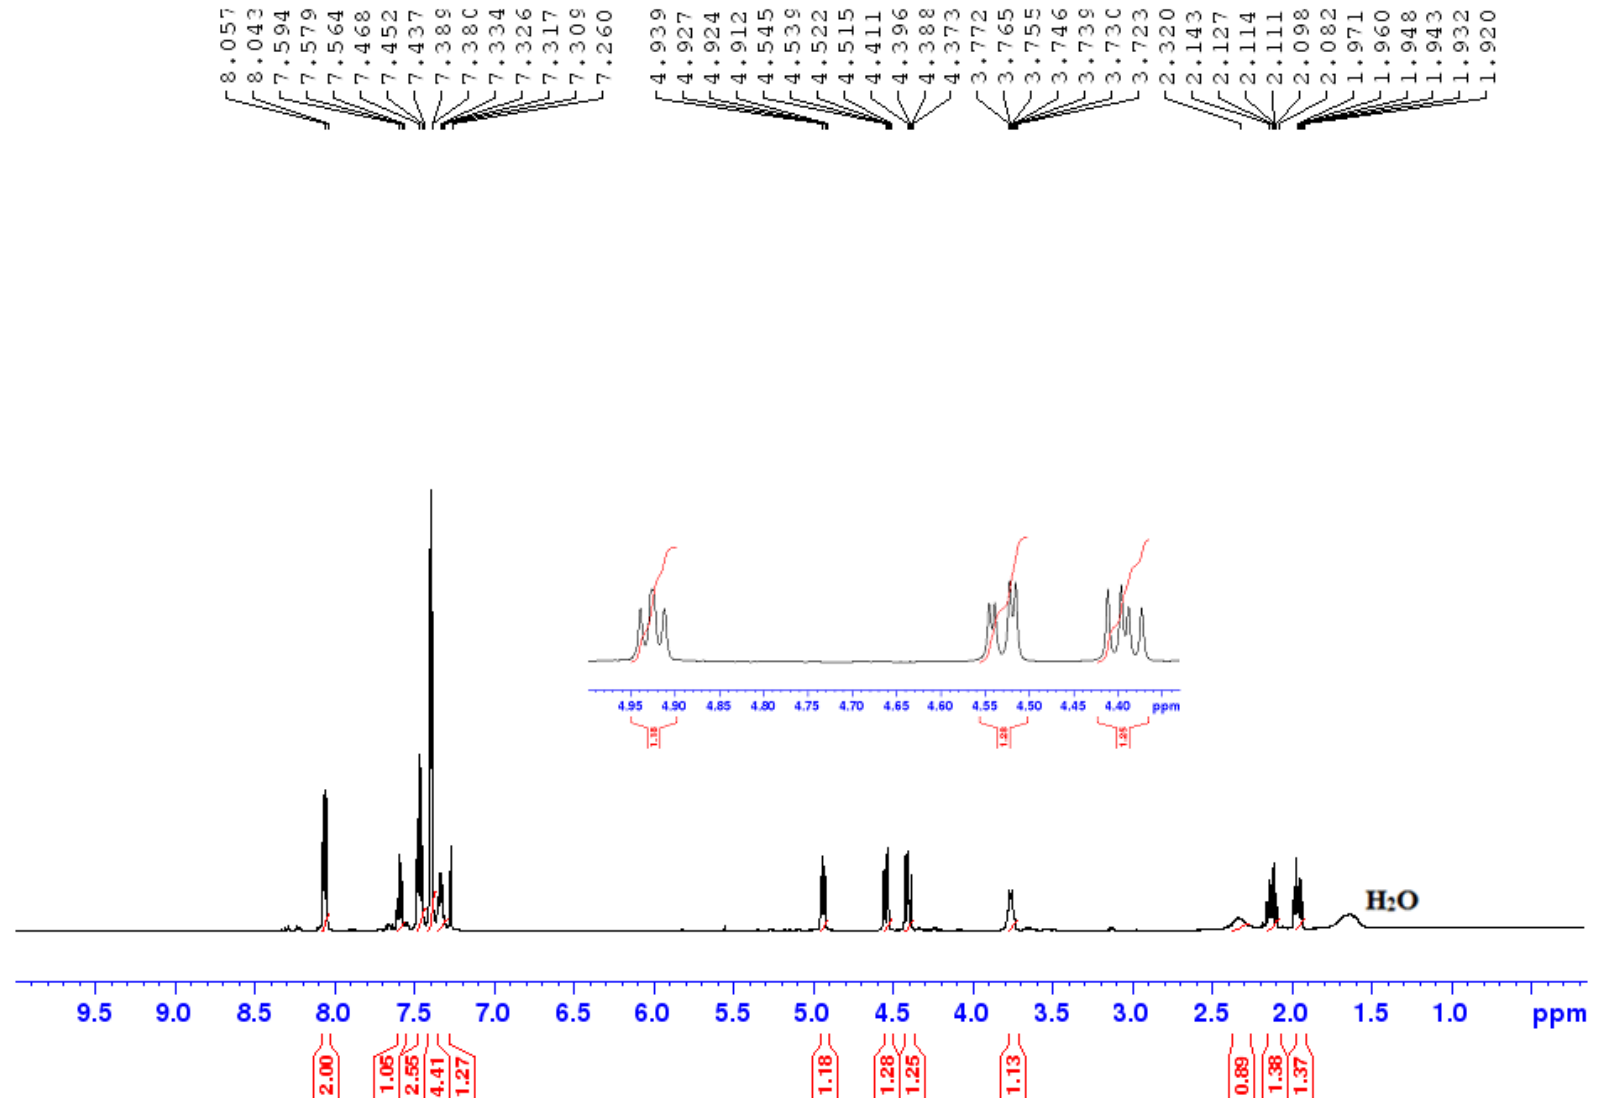

— 166.178  
 { 143.272  
 { 133.321  
 { 132.126  
 { 129.780  
 { 129.444  
 { 128.825  
 { 128.490  
 { 128.189  
 { 125.895  
 { 77.252  
 { 76.998  
 { 76.744  
 { 71.903  
 { 67.002  
 — 58.714  
 — 39.631

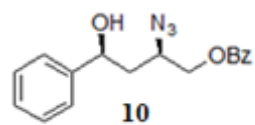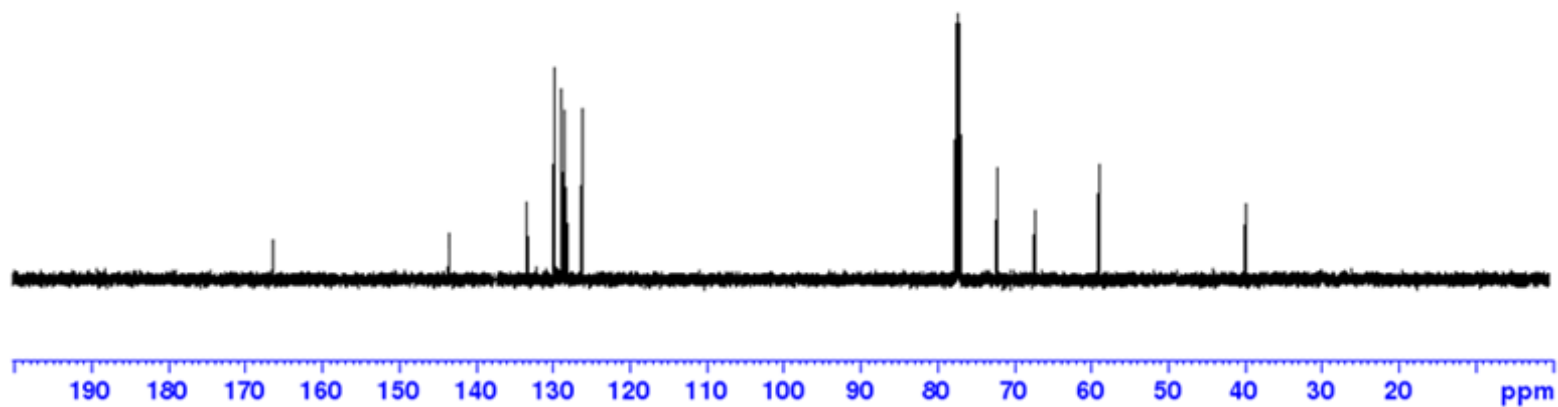

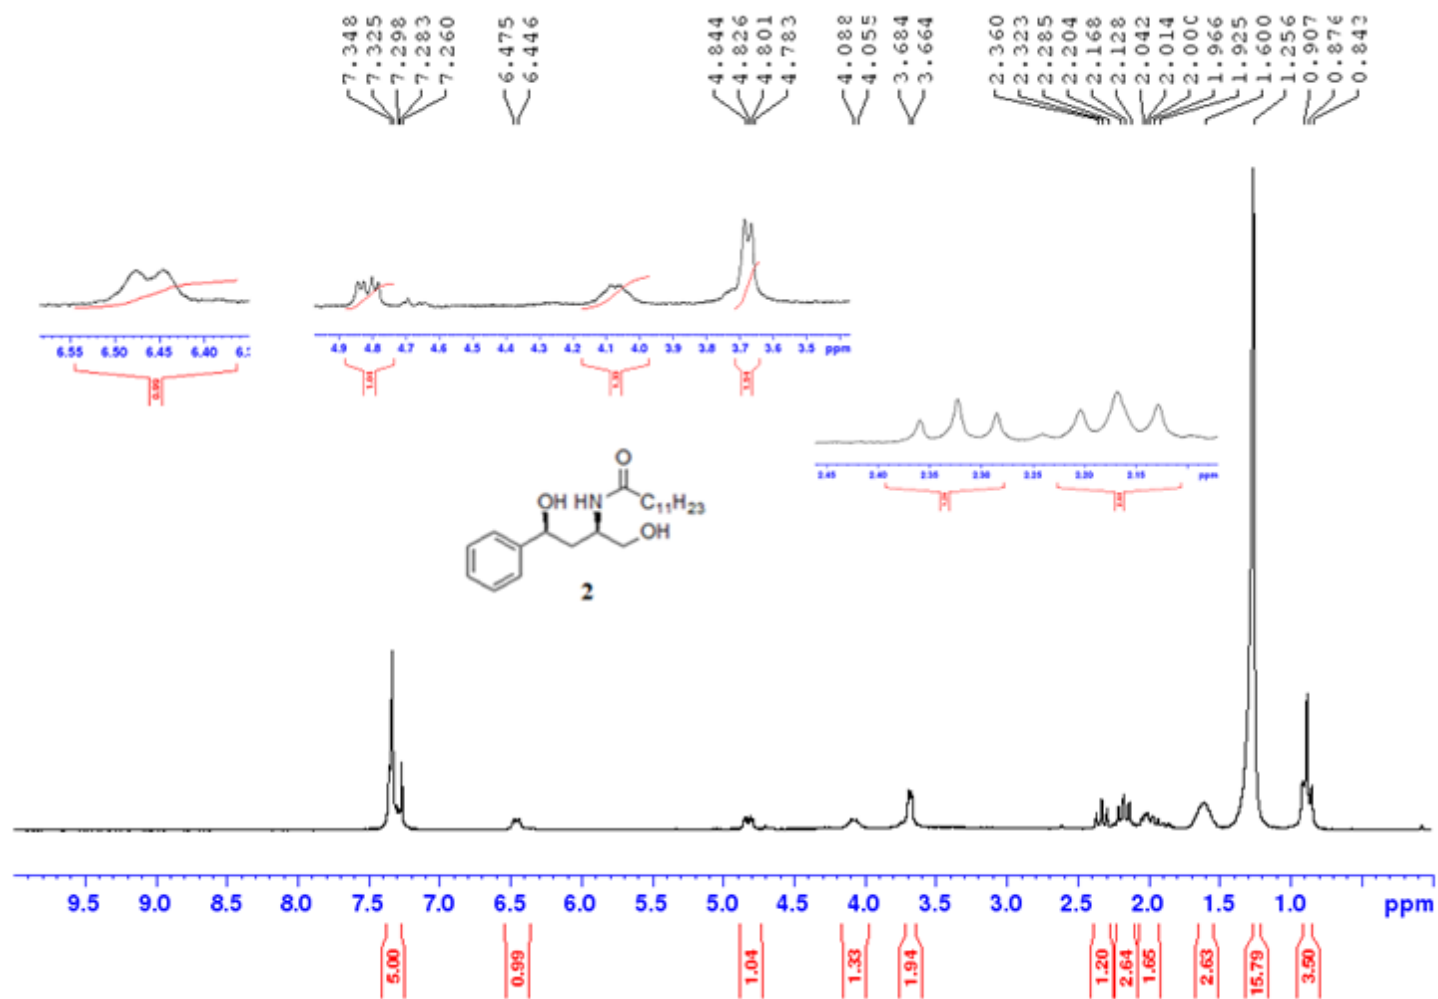

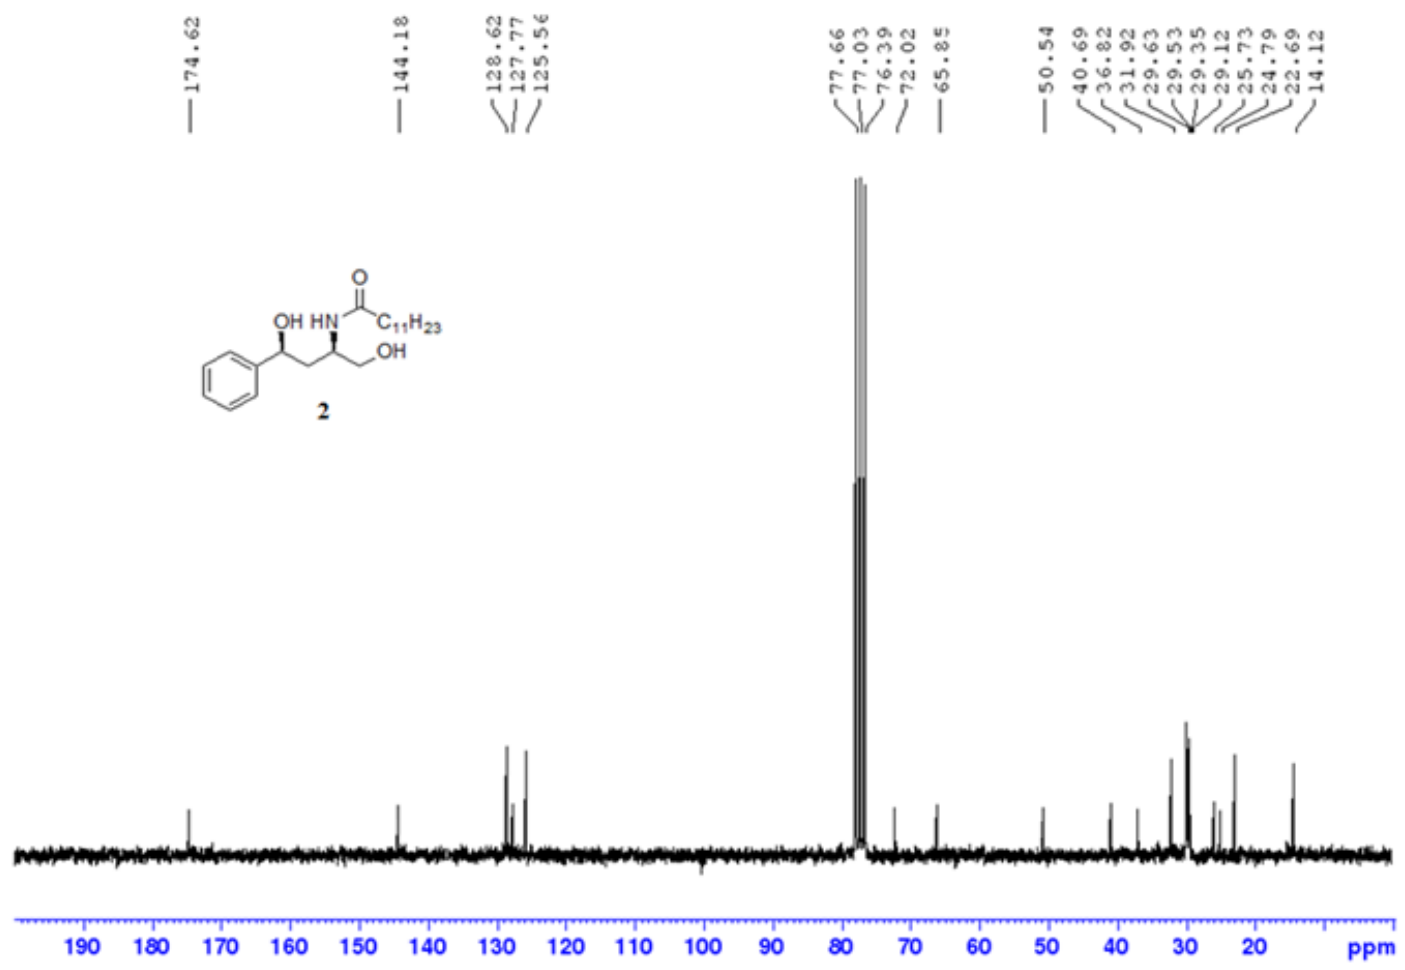

Supplement: Additional file 2 [file 1860-5397-15-42-S2.pdf]
